# Supplementary material for: Development of Novel Phase-Change Materials Derived from Methoxy Polyethylene Glycol and Aromatic Acyl Chlorides
Source: MDPI journal article supplement (doi:10.3390/polym15143069), 2023-07-17
Supplement: s1 [file s1]

# Development of Novel Phase-Change Materials Derived from Methoxy Polyethylene Glycol and Aromatic Acyl Chlorides

Alejandro Angel-López <sup>1</sup>, Ángel Norambuena <sup>1,2</sup>, C. Arriaza-Echanes <sup>1</sup>, Claudio A. Terraza <sup>3</sup>, Alain Tundidor-Camba <sup>3</sup>, Deysma Coll <sup>4,5</sup> and Pablo A. Ortiz <sup>5,6,\*</sup>

<sup>1</sup> Doctorado en Ciencias de Materiales Avanzados, Vicerrectoría de Investigación, Universidad Mayor, Santiago 8580745, Chile; alejandro.angel@mayor.cl (A.A.-L.); angel.norambuena@mayor.cl (Á.N.); c.arriazaechanes@gmail.com (C.A.-E.)

<sup>2</sup> Instituto de Investigaciones y Control del Ejército de Chile (IDIC), Santiago 8370899, Chile

<sup>3</sup> Research Laboratory for Organic Polymers (RLOP), Department of Organic Chemistry, Pontificia Universidad Católica de Chile, Santiago 7820244, Chile; cterraza@uc.cl (C.A.T.); atundido@uc.cl (A.T.-C.)

<sup>4</sup> Núcleo de Química y Bioquímica, Facultad de Ciencias, Ingeniería y Tecnología, Universidad Mayor, Santiago 8580745, Chile; deysma.coll@umayor.cl

<sup>5</sup> Centro de Nanotecnología Aplicada, Facultad de Ciencias, Ingeniería y Tecnología, Universidad Mayor, Santiago 8580745, Chile

<sup>6</sup> Escuela de Ingeniería en Medio Ambiente y Sustentabilidad, Facultad de Ciencias, Ingeniería y Tecnología, Universidad Mayor, Santiago 8580745, Chile

\* Correspondence: pablo.ortiz@umayor.cl

## SUPPLEMENTARY MATERIAL

### 1. Experimental methodology

Figure S1 shows the experimental setup used during the synthesis of the PCMs derived from the methoxy polyethylene glycol and aromatic acyl chlorides.

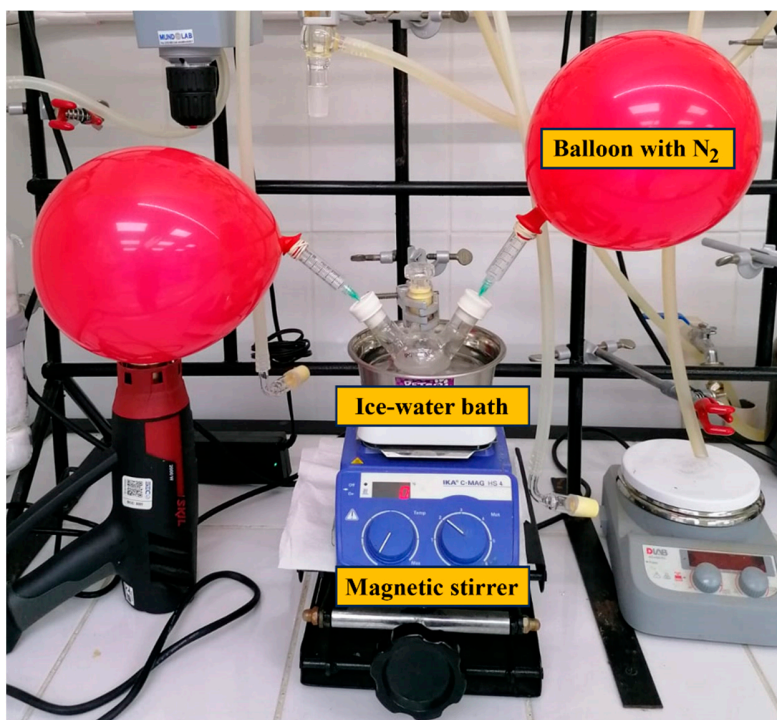

**Figure S1.** Experimental setup used for the synthesis of PCMs.

## 2. PCMs synthesis

Table S1 shows the amounts of the used materials for the preparation of each sample.

**Table S1.** Amount of the used materials for the preparation of each PCM.

| PCMs         | MPEG<br>(mmol) | TEA<br>(mmol) | THF<br>(mL) | CHCl <sub>3</sub><br>(mL) | AC<br>(mmol) | Yield<br>(%) |
|--------------|----------------|---------------|-------------|---------------------------|--------------|--------------|
| TPC-MPEG350  | 12.2           | 12.2          | 10.0        | 0.0                       | 6.0          | 88.1         |
| TPC-MPEG550  | 8.2            | 8.2           | 10.0        | 0.0                       | 4.1          | 89.0         |
| TPC-MPEG750  | 6.2            | 6.2           | 10.0        | 0.0                       | 3.1          | 91.7         |
| TPC-MPEG2000 | 2.5            | 2.5           | 5.0         | 5.0                       | 1.2          | 92.8         |
| TPC-MPEG5000 | 1.0            | 1.0           | 5.0         | 5.0                       | 0.5          | 92.3         |
| IPC-MPEG350  | 12.2           | 12.2          | 10.0        | 0.0                       | 6.0          | 90.5         |
| IPC-MPEG550  | 8.2            | 8.2           | 10.0        | 0.0                       | 4.1          | 93.4         |
| IPC-MPEG750  | 6.2            | 6.2           | 10.0        | 0.0                       | 3.1          | 91.2         |
| IPC-MPEG2000 | 2.5            | 2.5           | 5.0         | 5.0                       | 1.2          | 89.8         |
| IPC-MPEG5000 | 1.0            | 1.0           | 5.0         | 5.0                       | 0.5          | 89.5         |

MPEG: Methoxy polyethylene glycol, TEA: Triethylamine, THF: Tetrahydrofuran, CHCl<sub>3</sub>: Chloroform and AC: Acyl Chloride.

## 3. Spectroscopic characterization

The infrared and <sup>1</sup>H, <sup>13</sup>C and Dept 135° NMR spectra obtained for each PCMs synthesized are shown below.

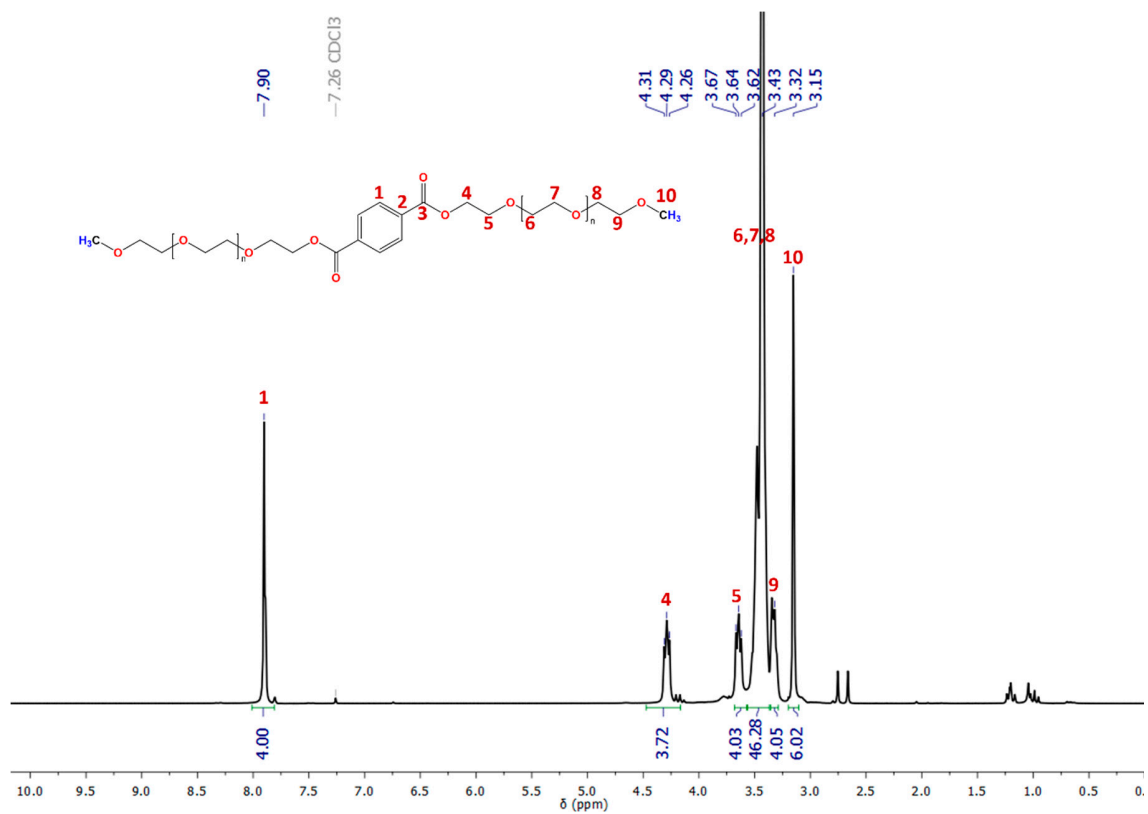

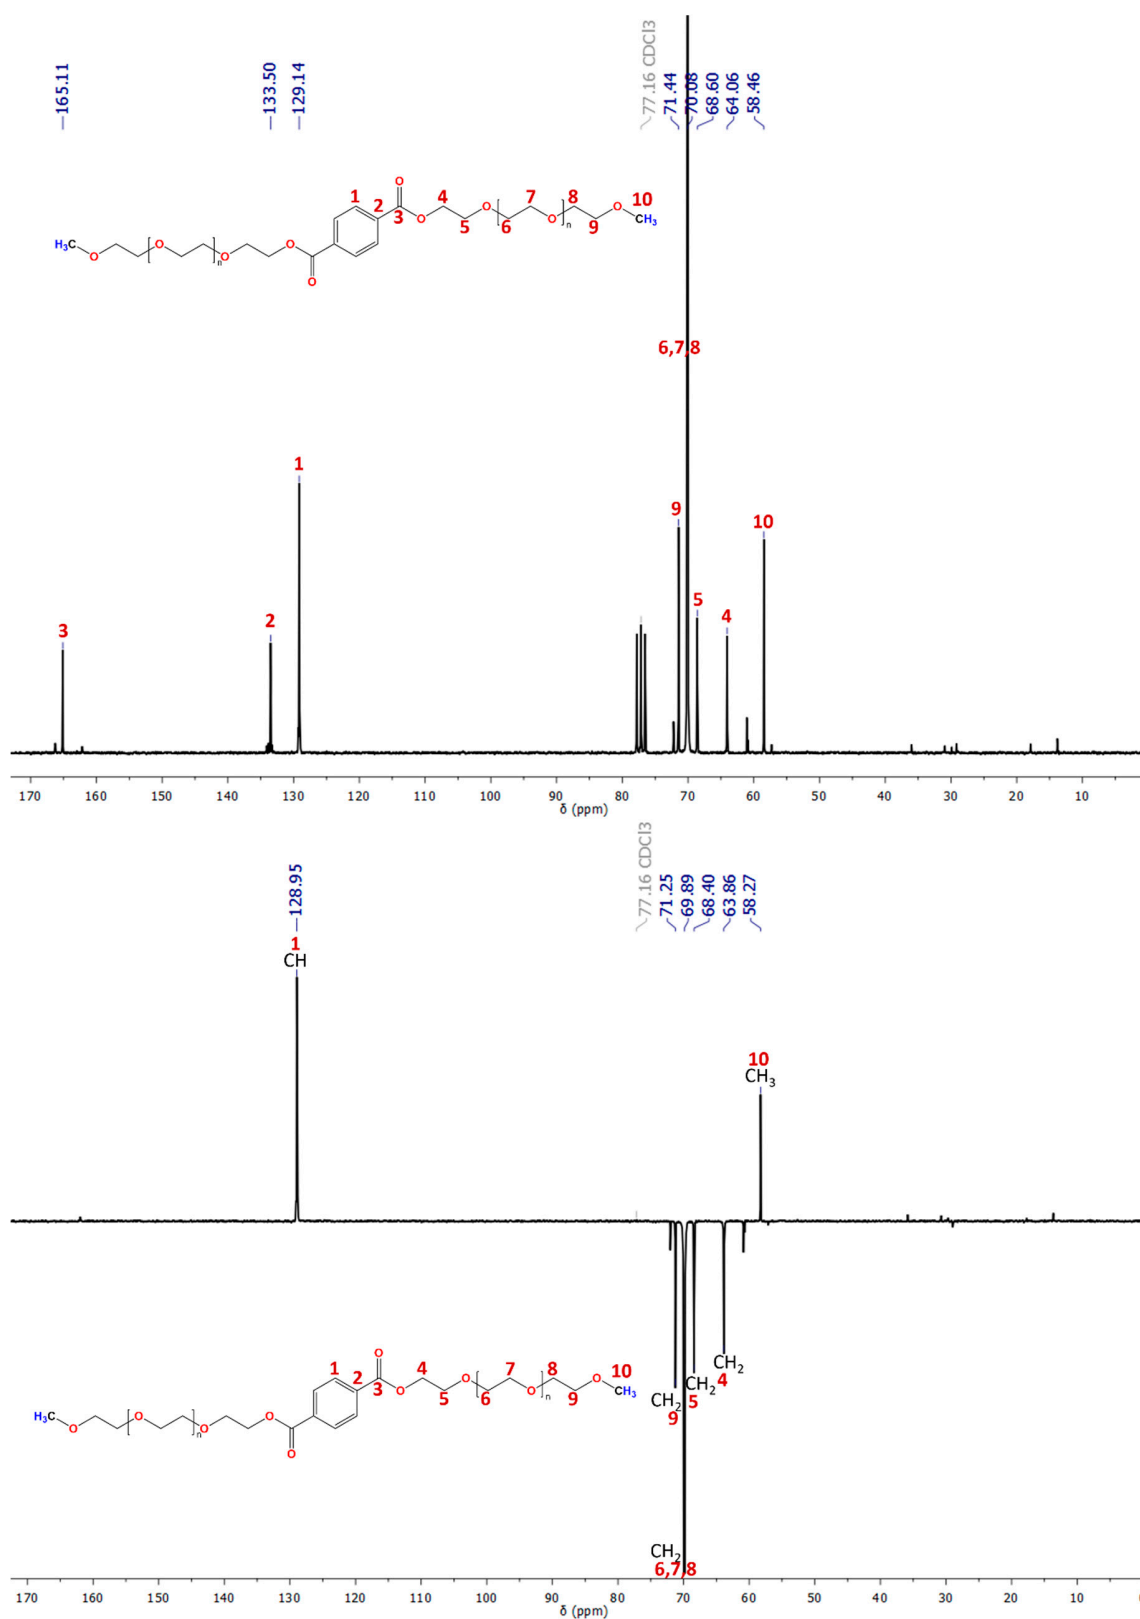

**Figure S2.** Infrared and  $^1\text{H}$ ,  $^{13}\text{C}$  and DEPT 135° NMR spectra of TPC-MPEG350.

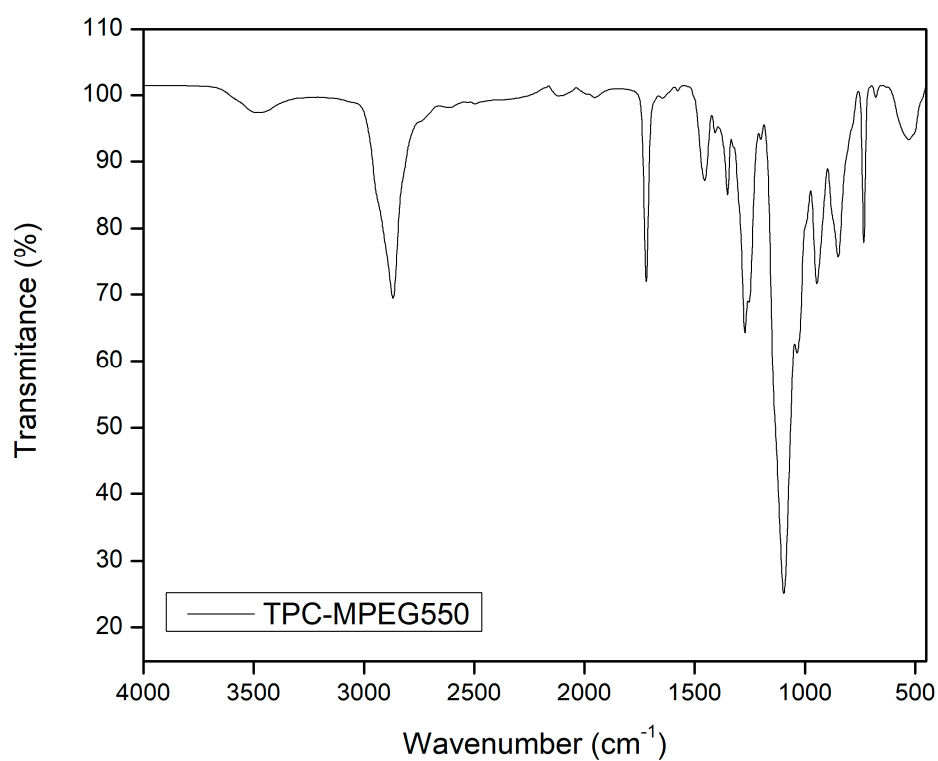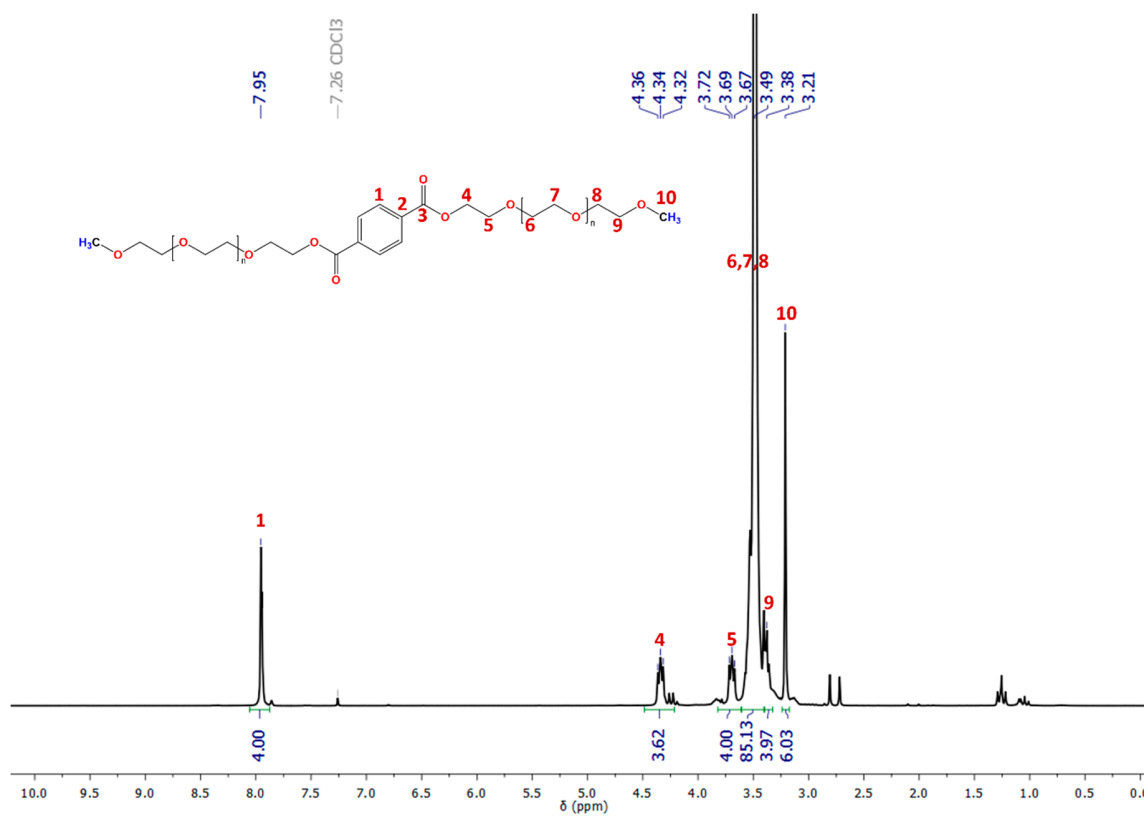

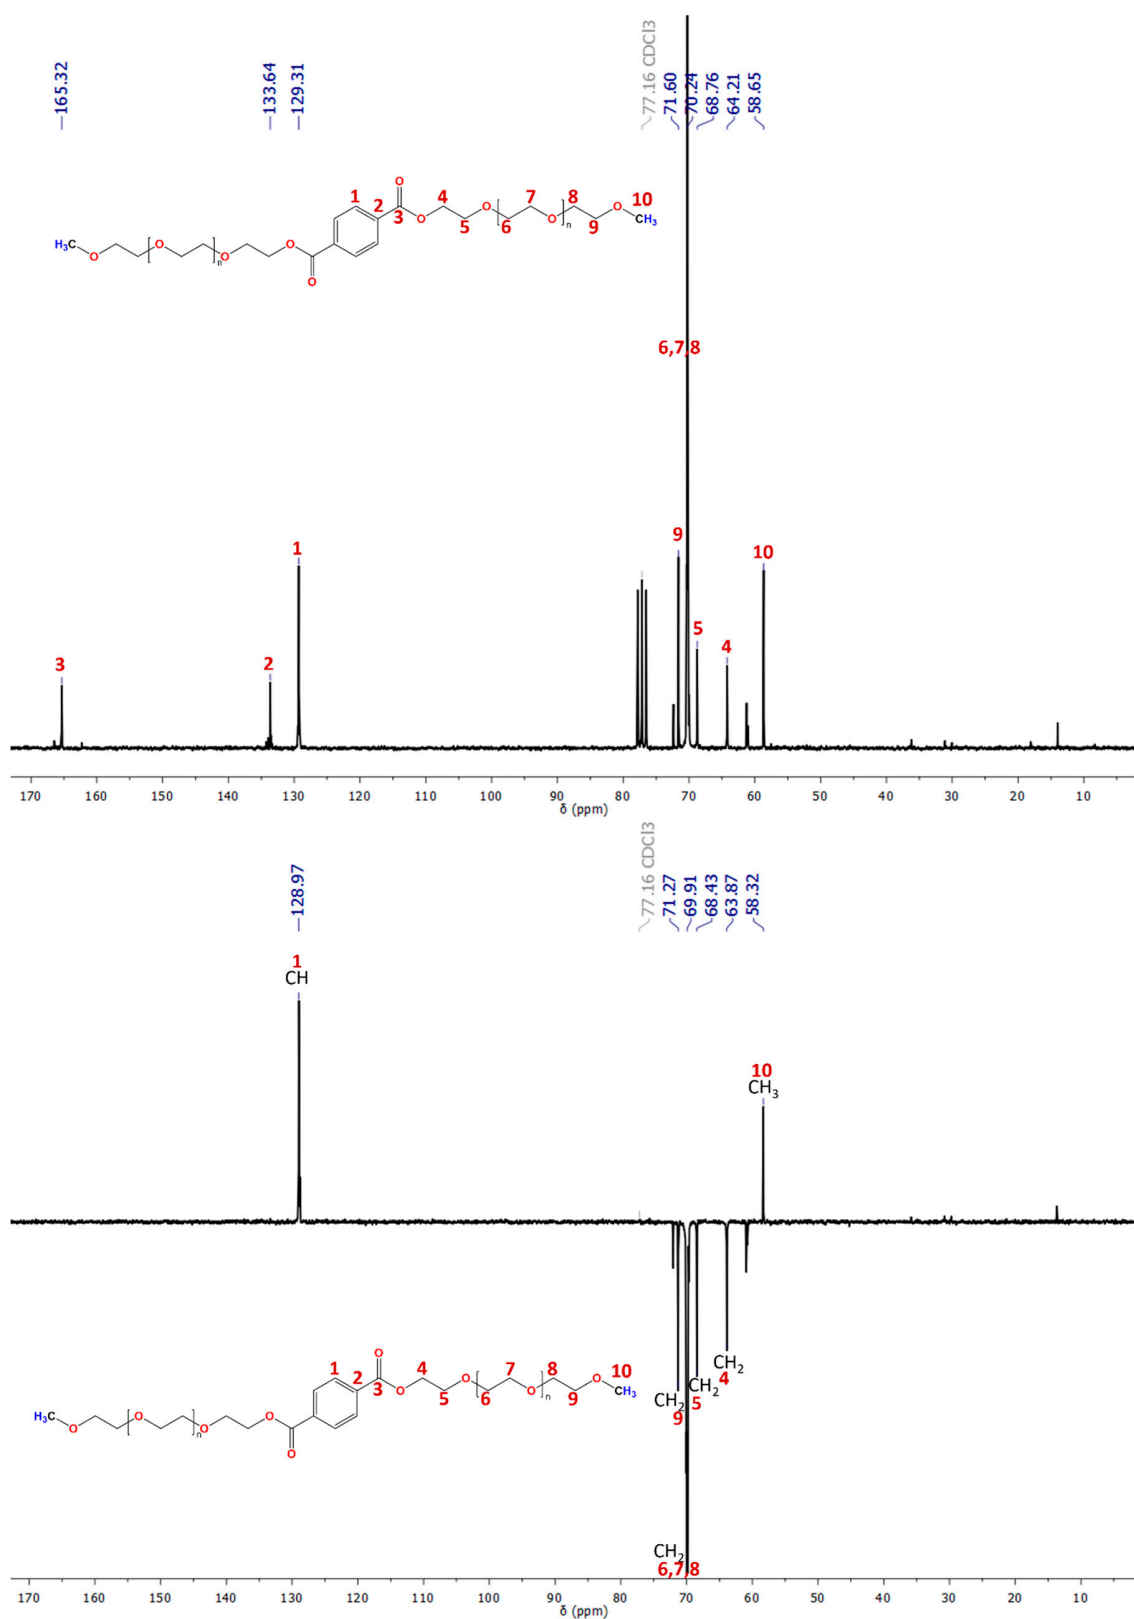

**Figure S3.** Infrared and  $^1\text{H}$ ,  $^{13}\text{C}$  and DEPT  $135^\circ$  NMR spectra of TPC-MPEG550.

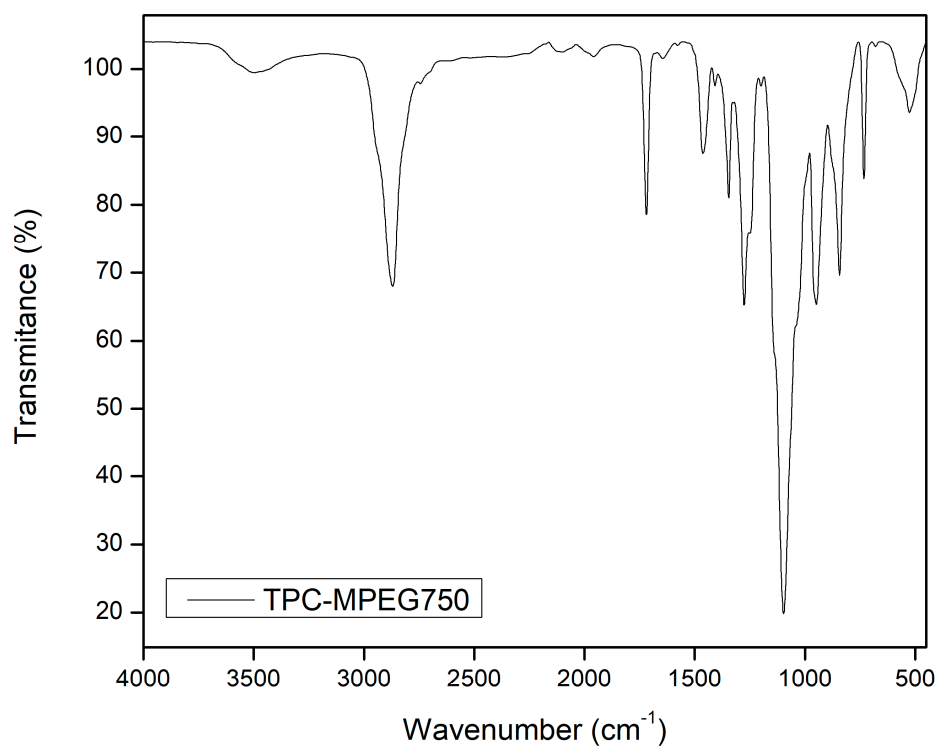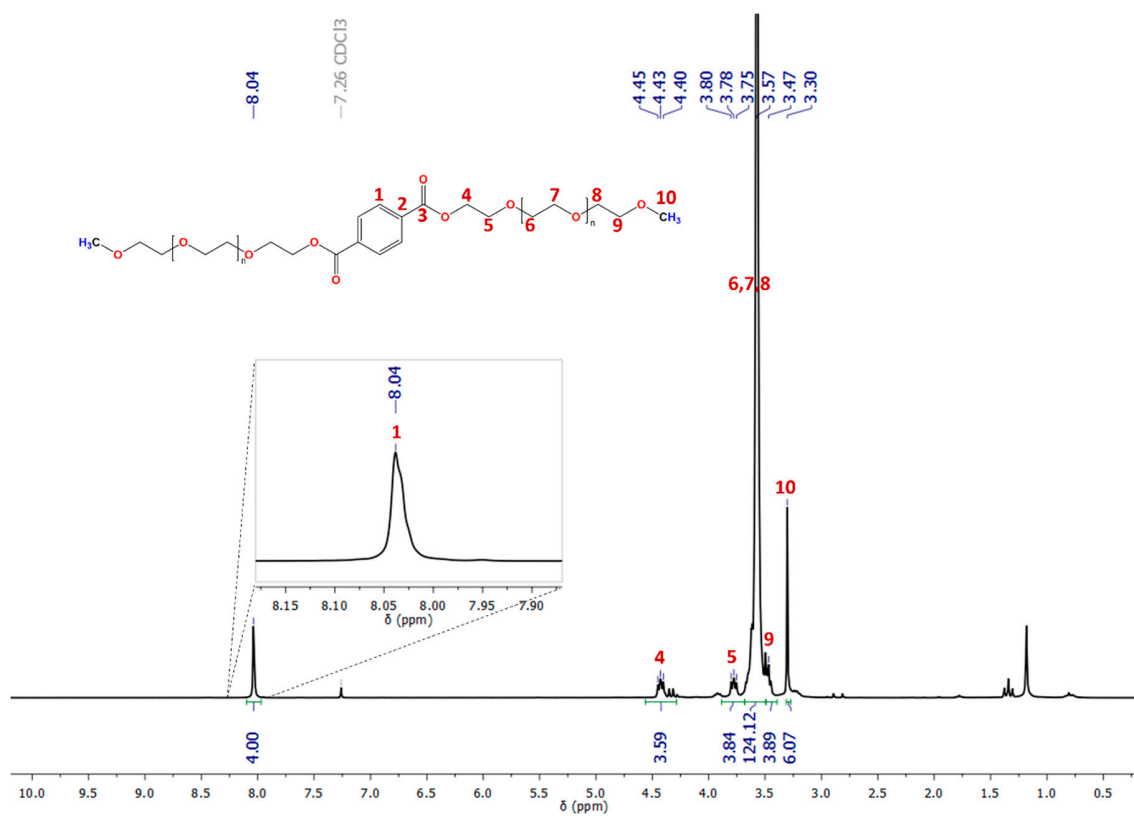

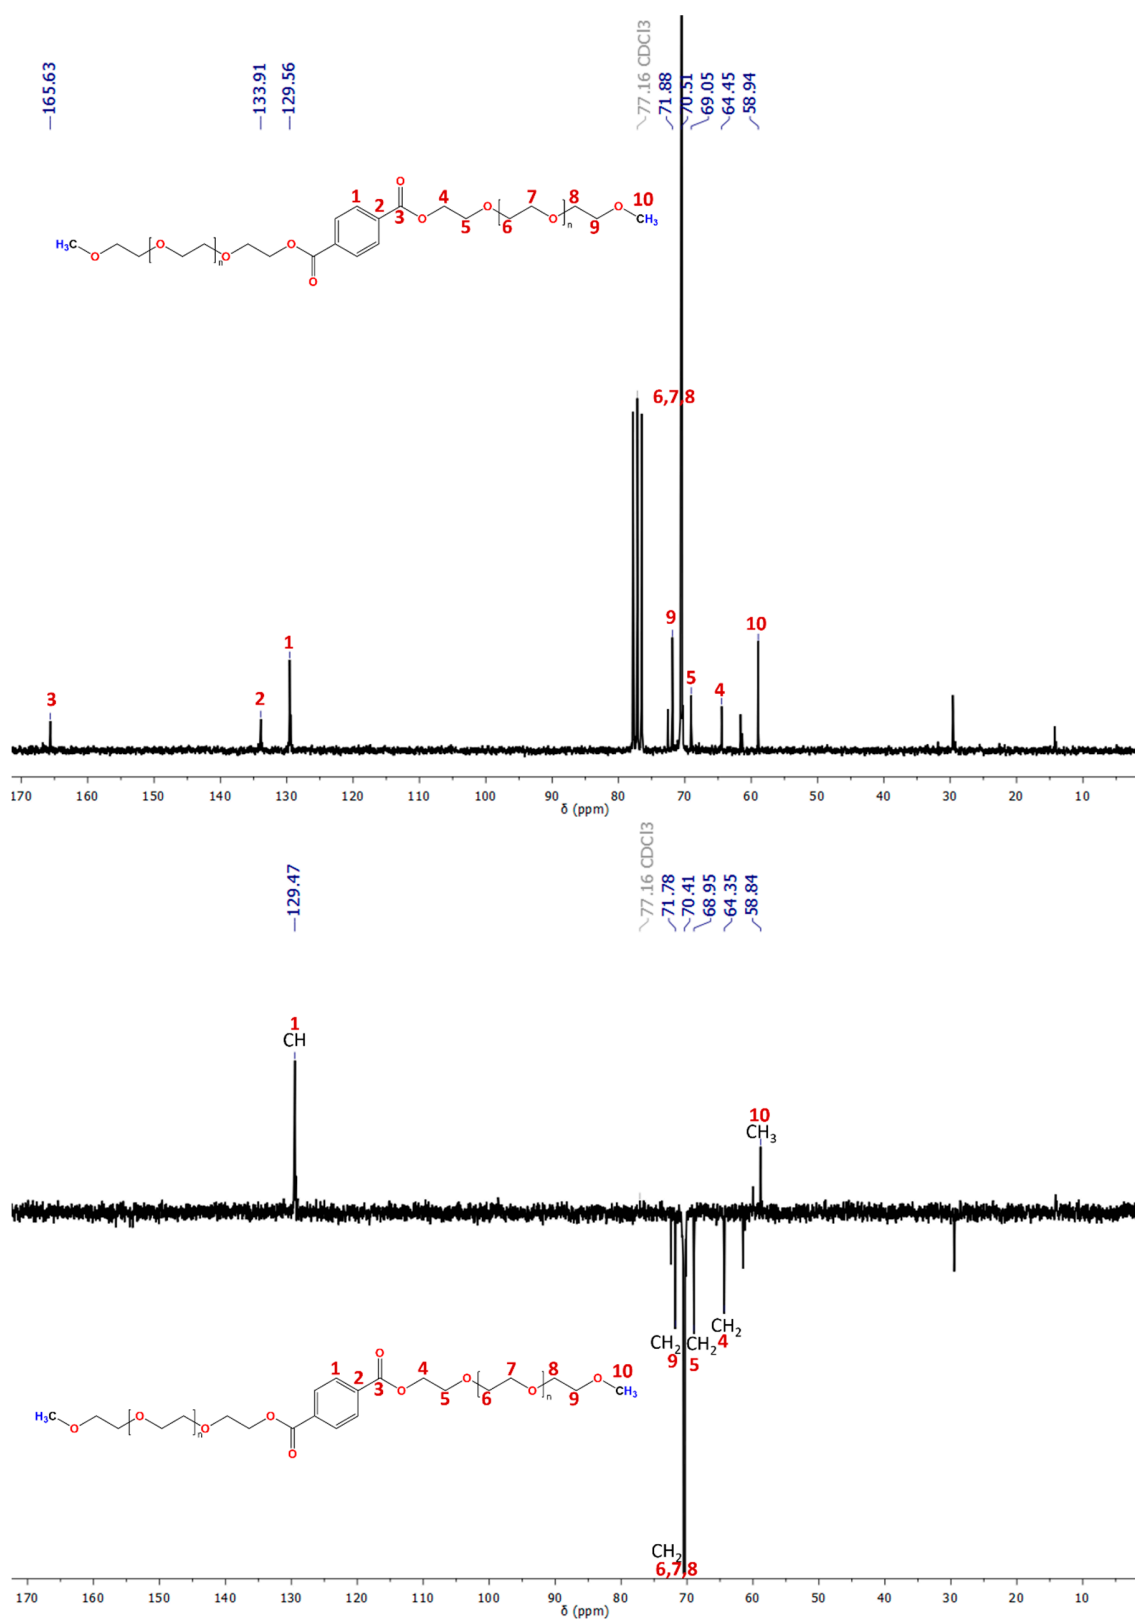

Figure S4. Infrared and <sup>1</sup>H, <sup>13</sup>C and DEPT 135° NMR spectra of TPC-MPEG750.



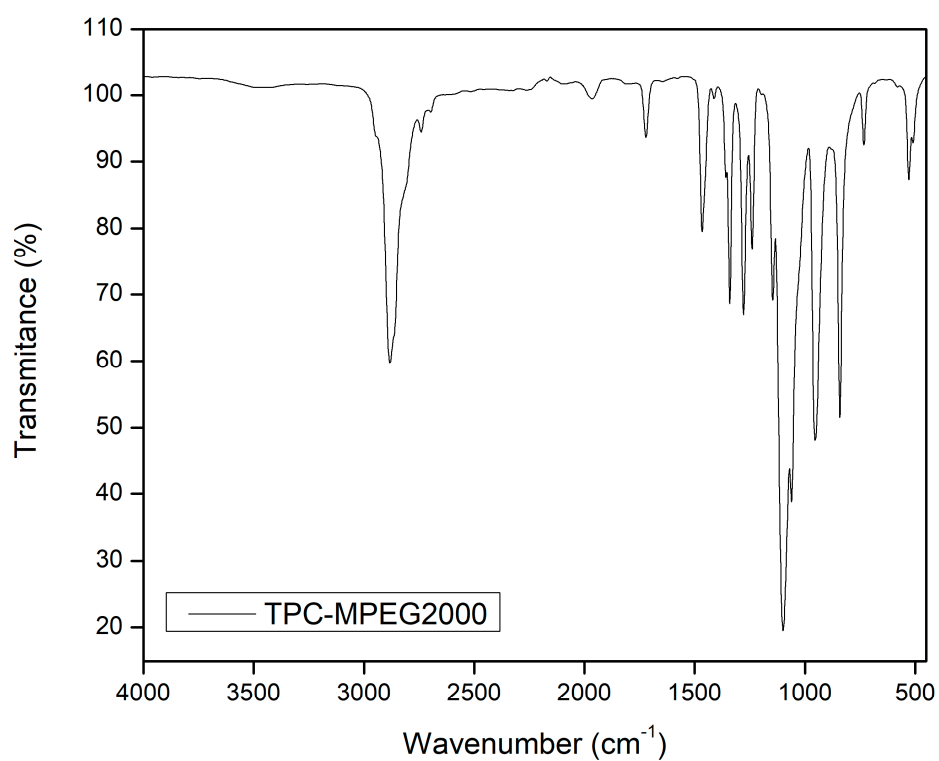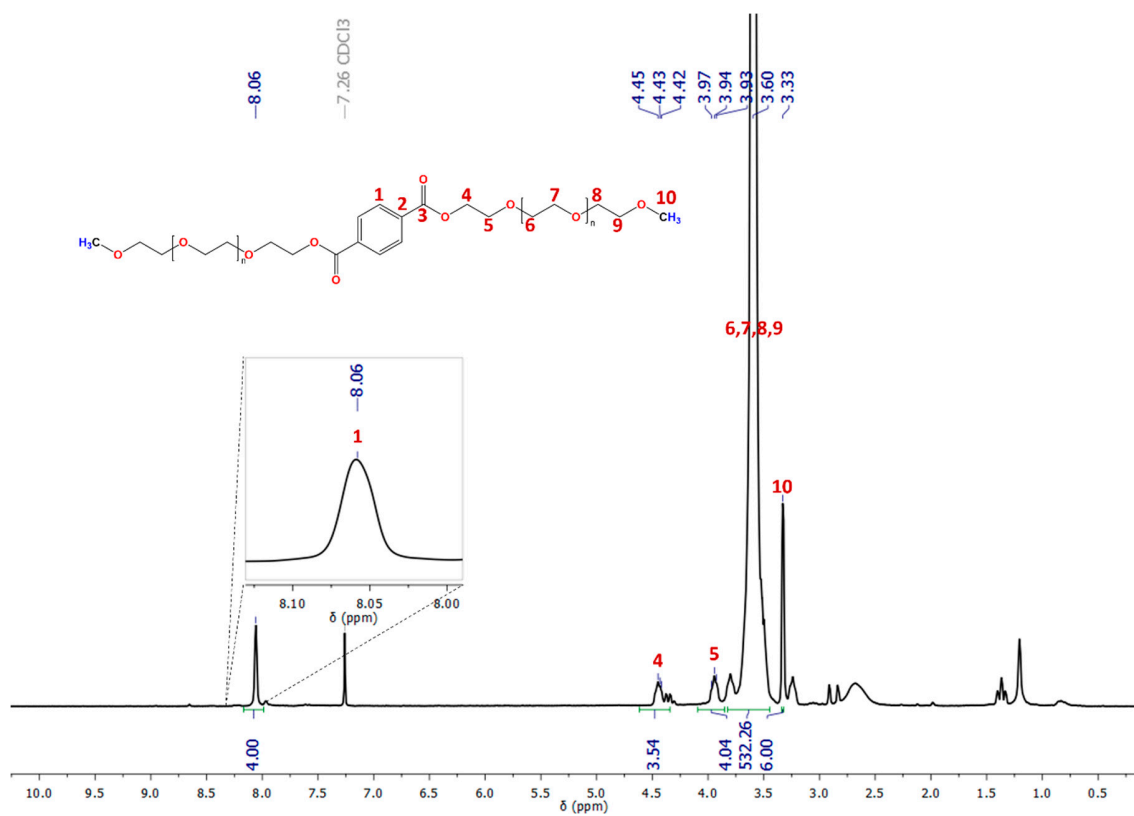

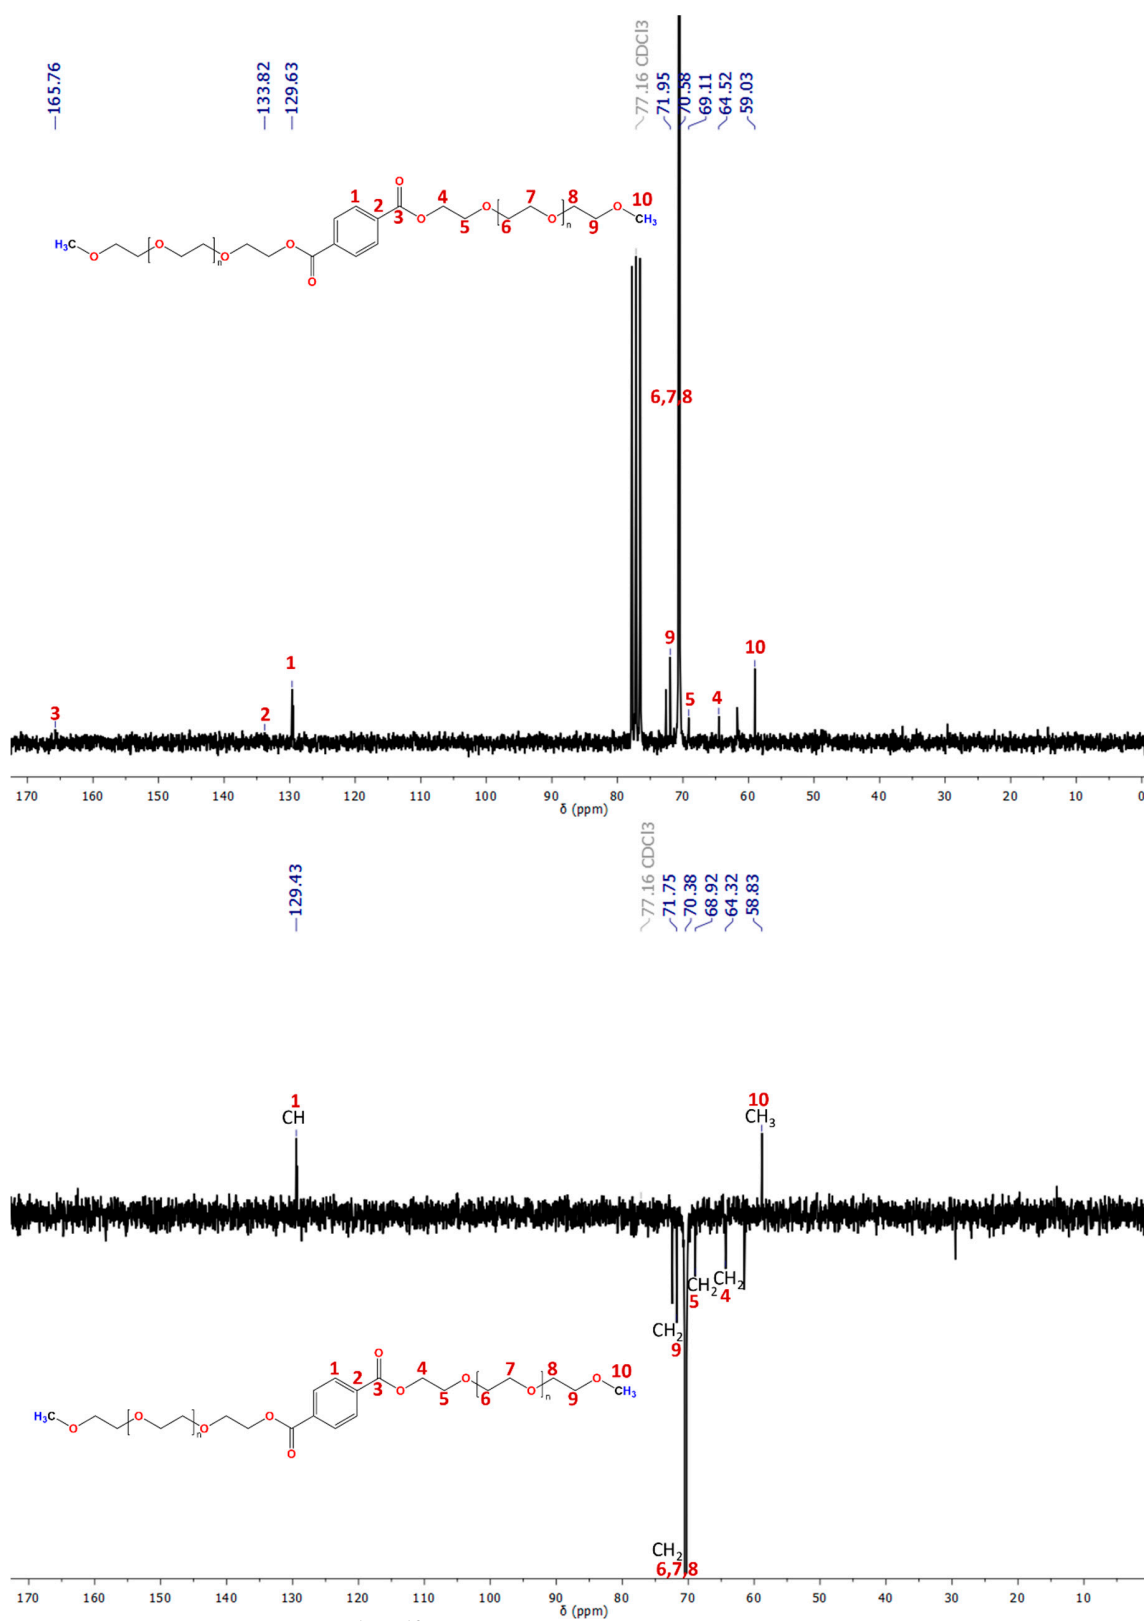

**Figure S5.** Infrared and  $^1\text{H}$ ,  $^{13}\text{C}$  and DEPT  $135^\circ$  NMR spectra of TPC-MPEG2000.

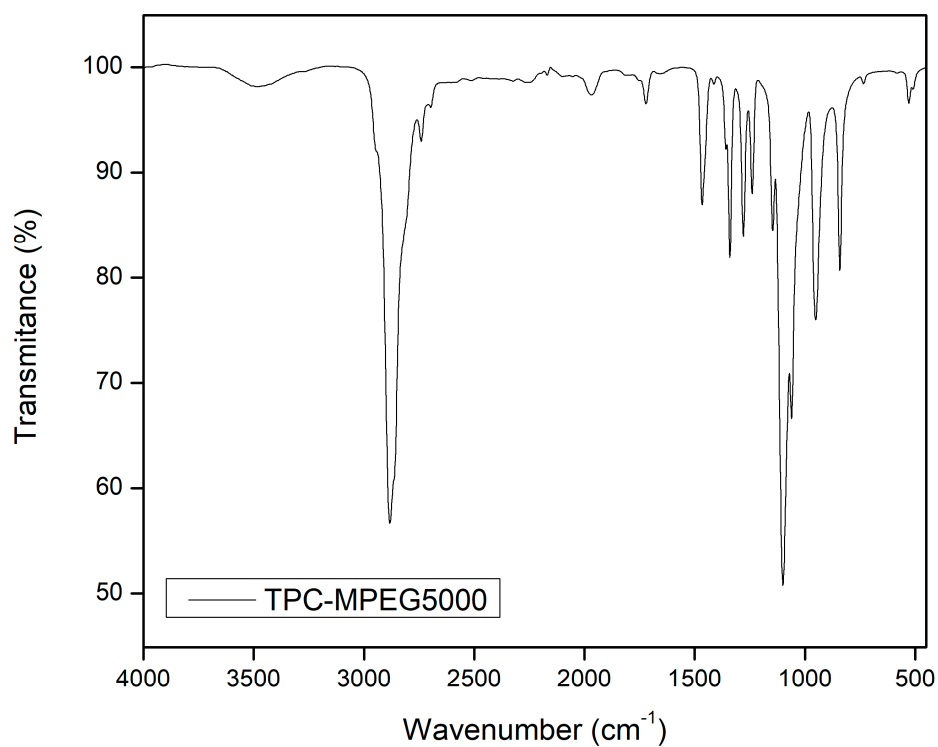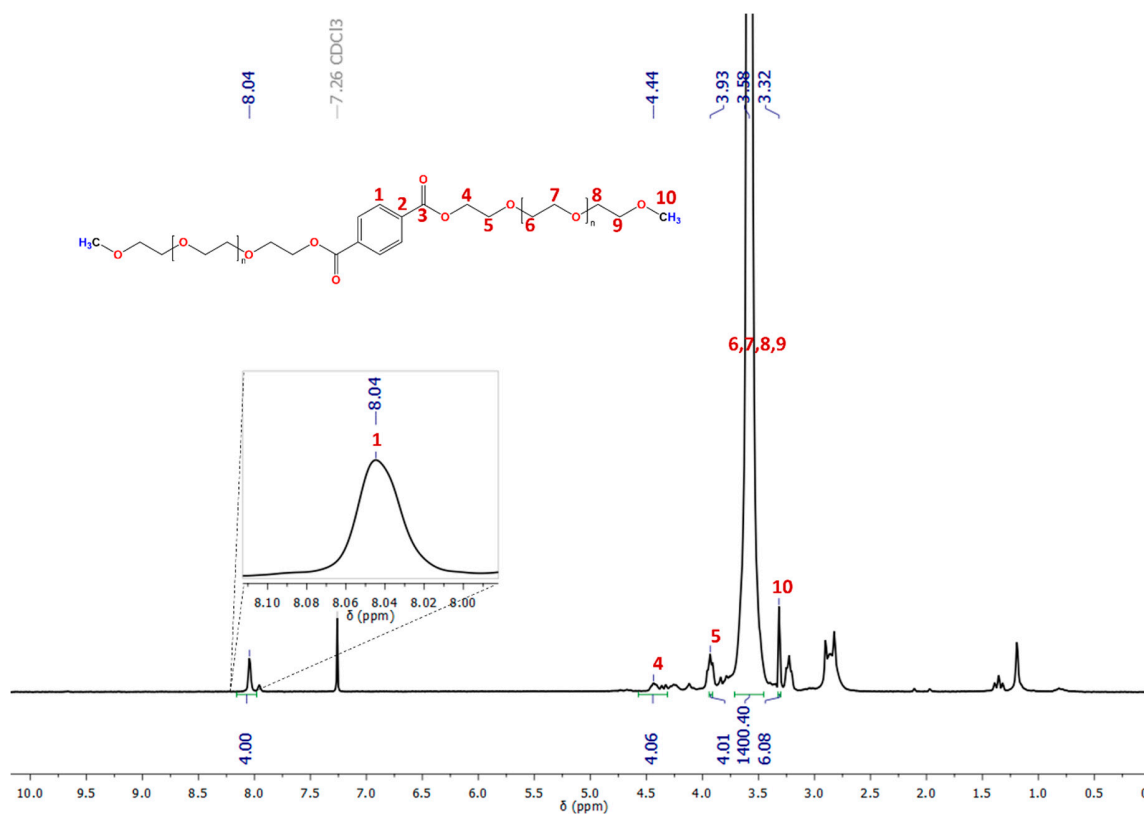

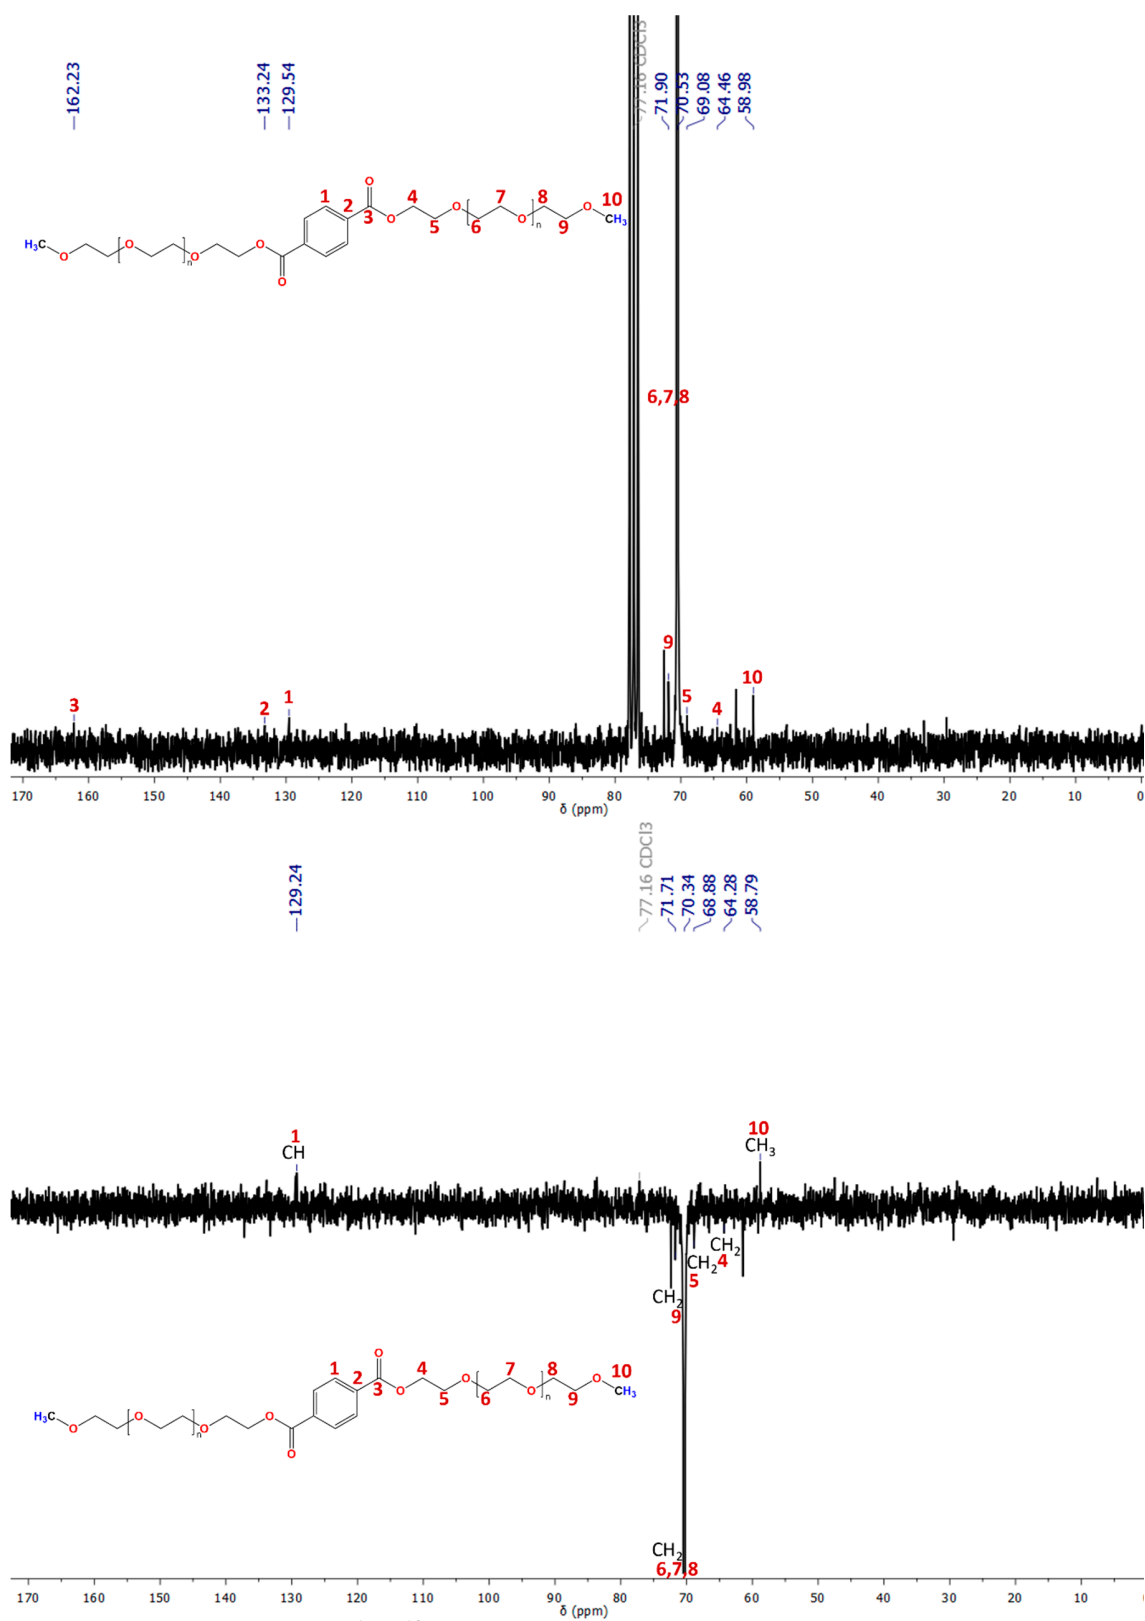

**Figure S6.** Infrared and  $^1\text{H}$ ,  $^{13}\text{C}$  and DEPT  $135^\circ$  NMR spectra of TPC-MPEG5000.

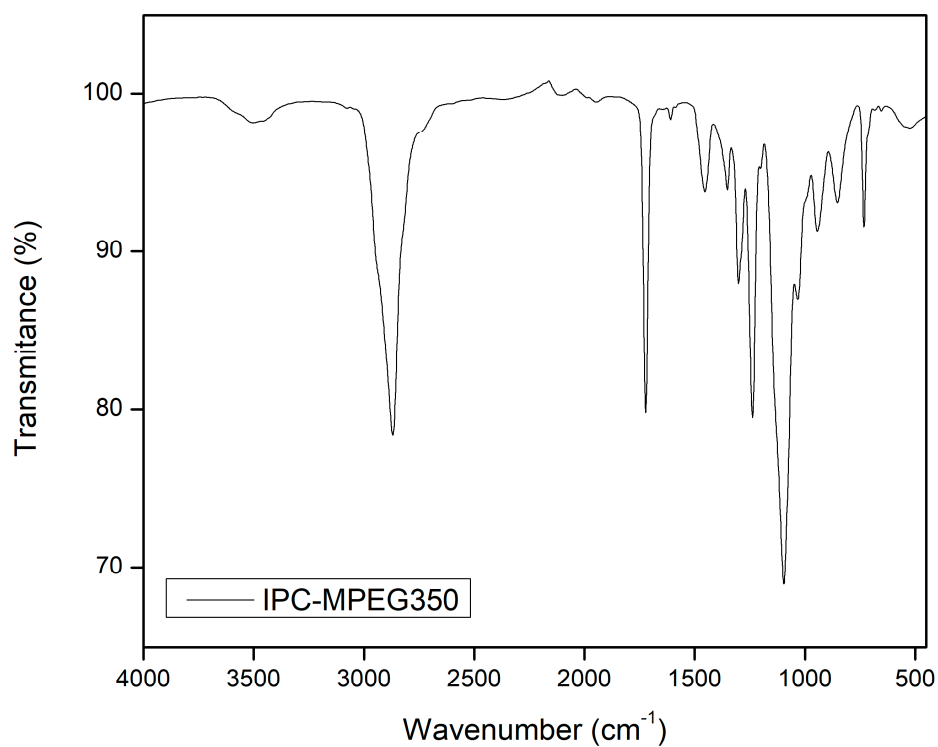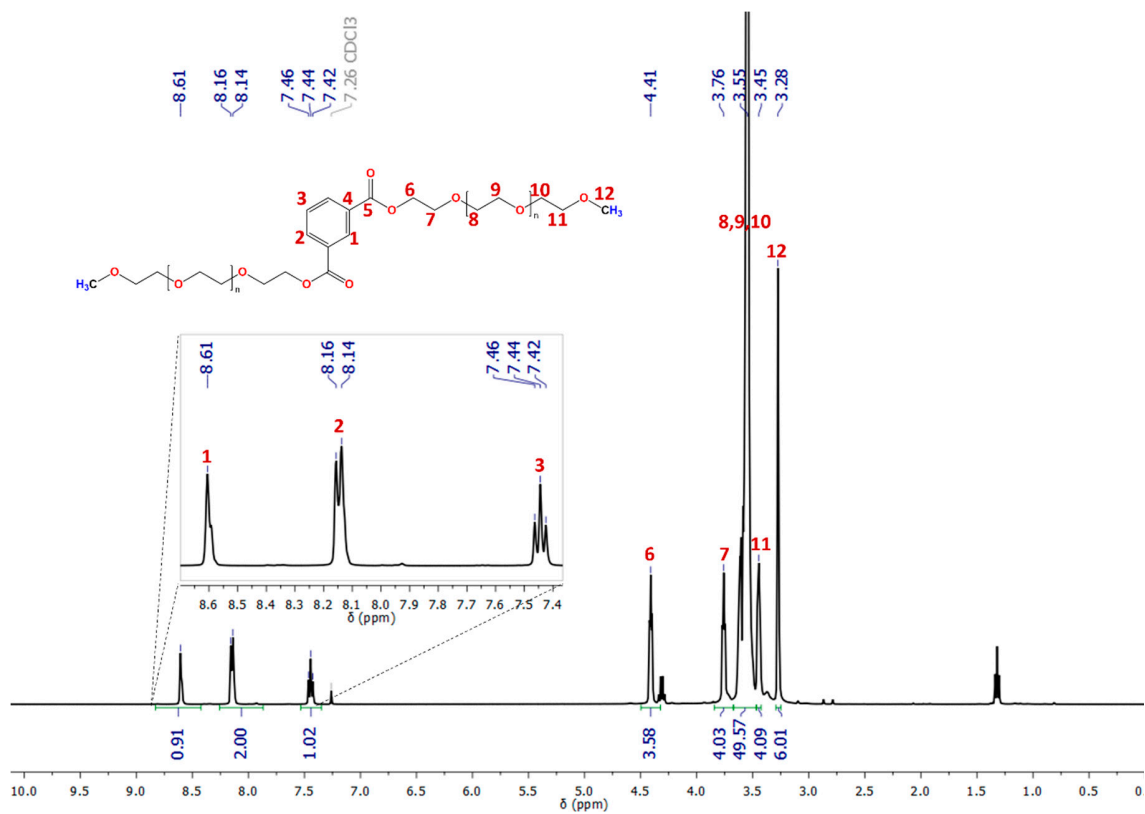

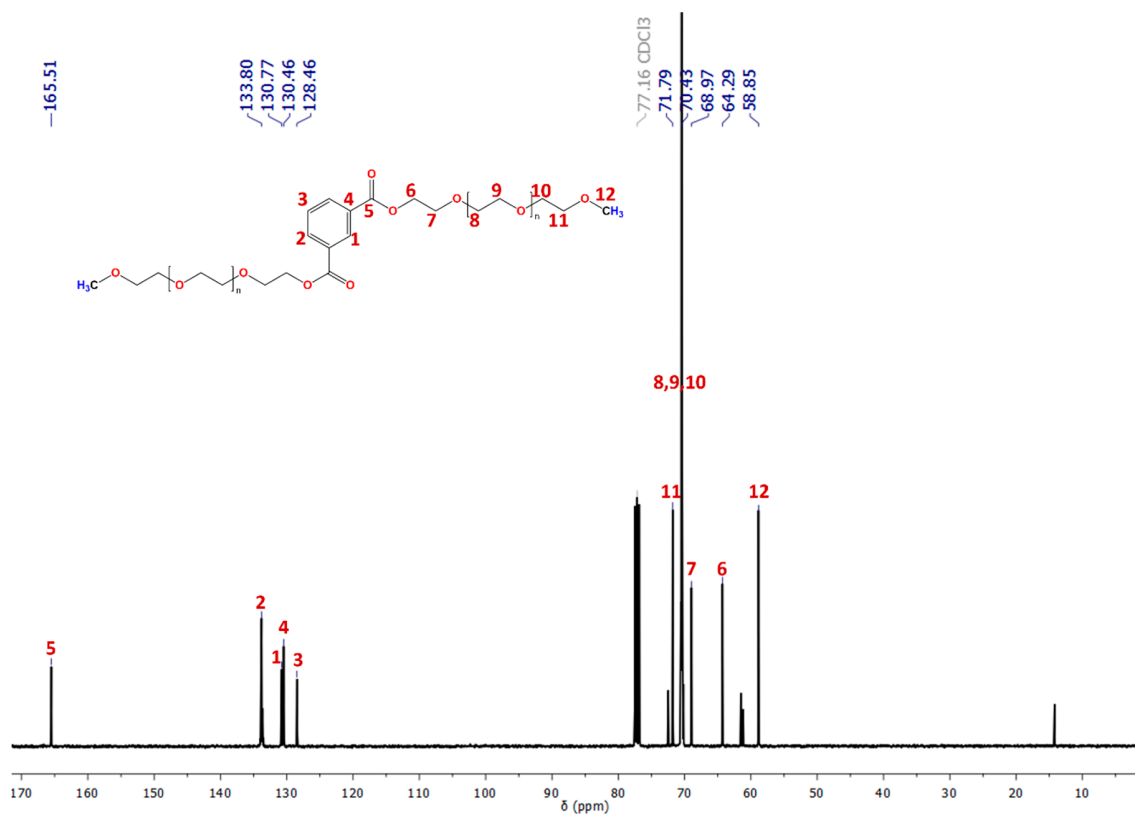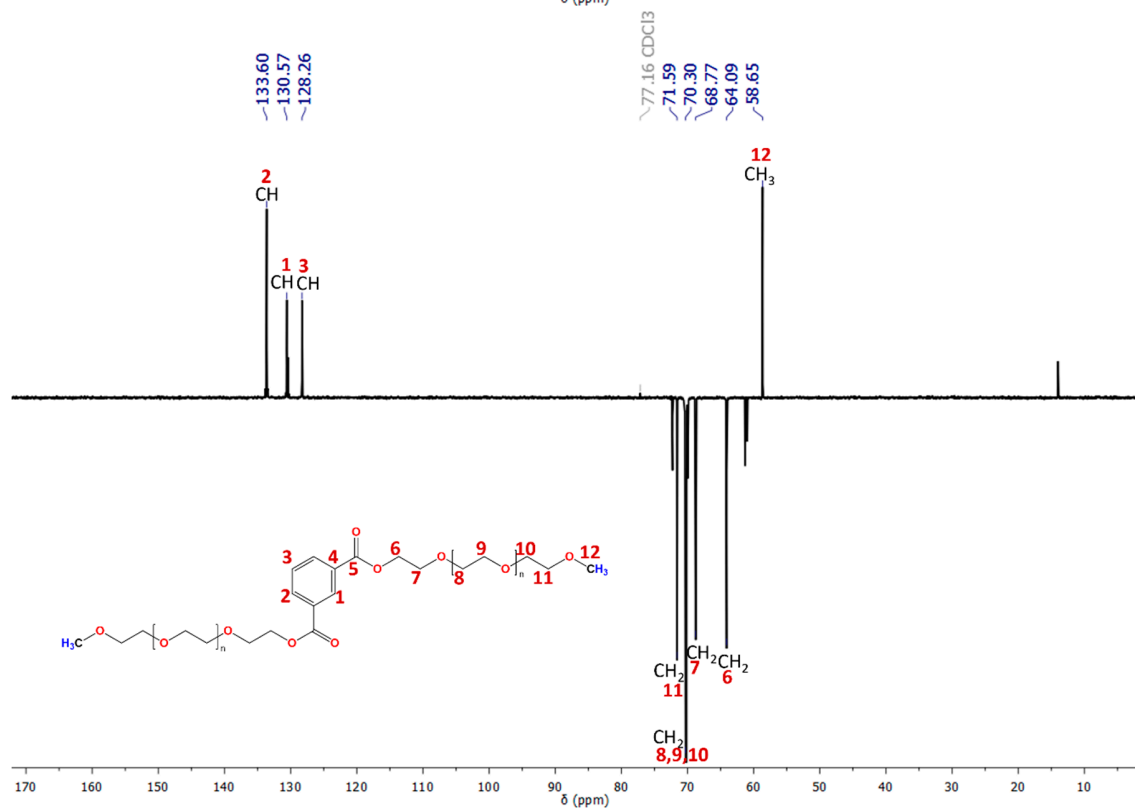

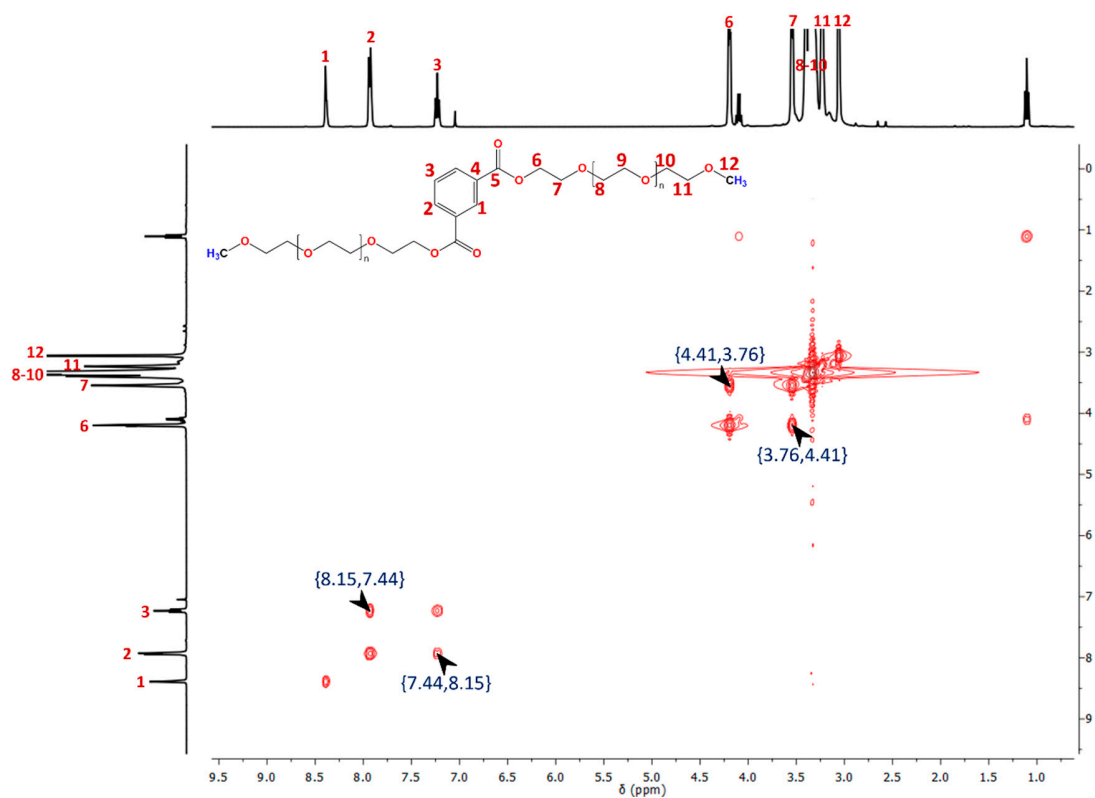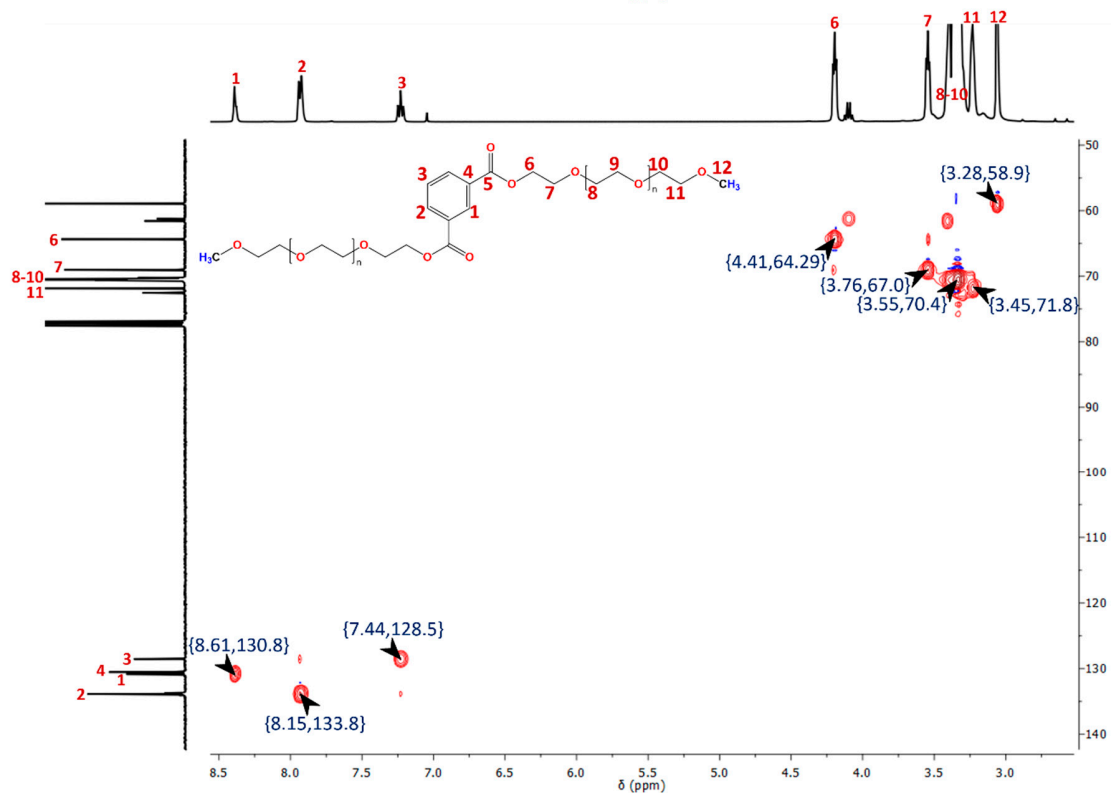

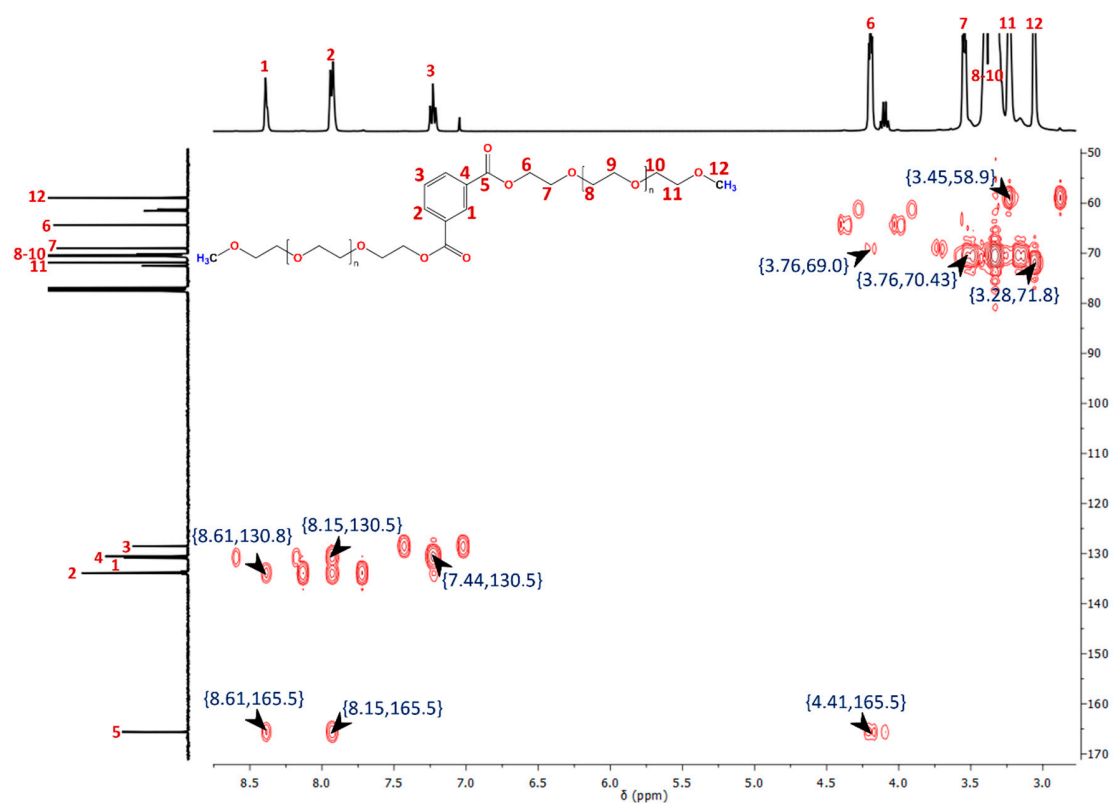

**Figure S7.** Infrared and  $^1\text{H}$ ,  $^{13}\text{C}$ , DEPT 135°, COSY, HMQC and HMBC NMR spectra of IPC-MPEG350.



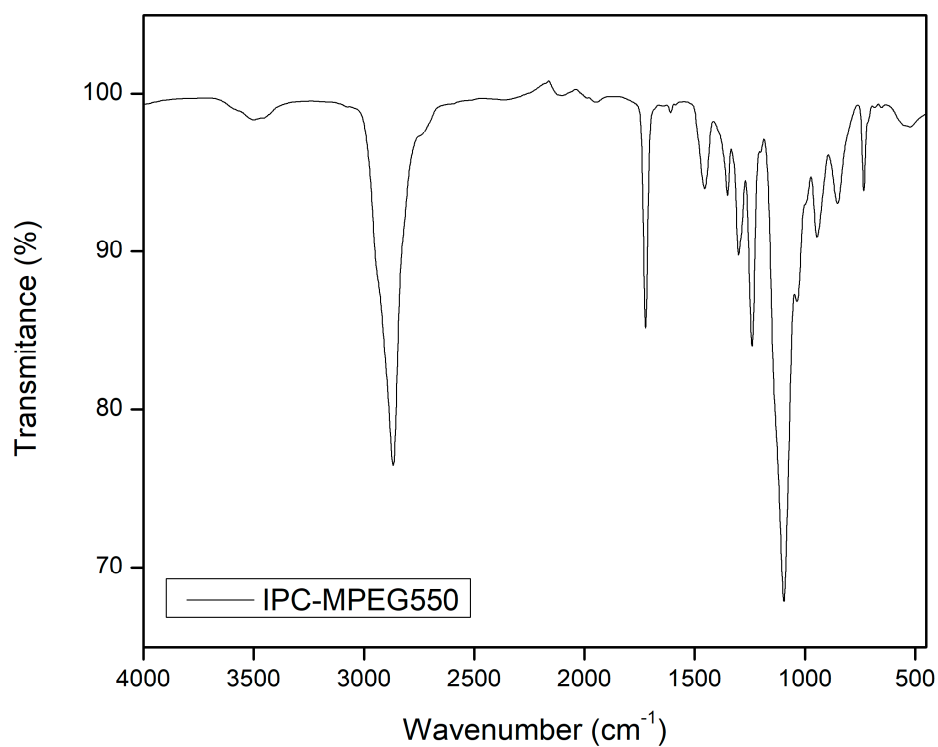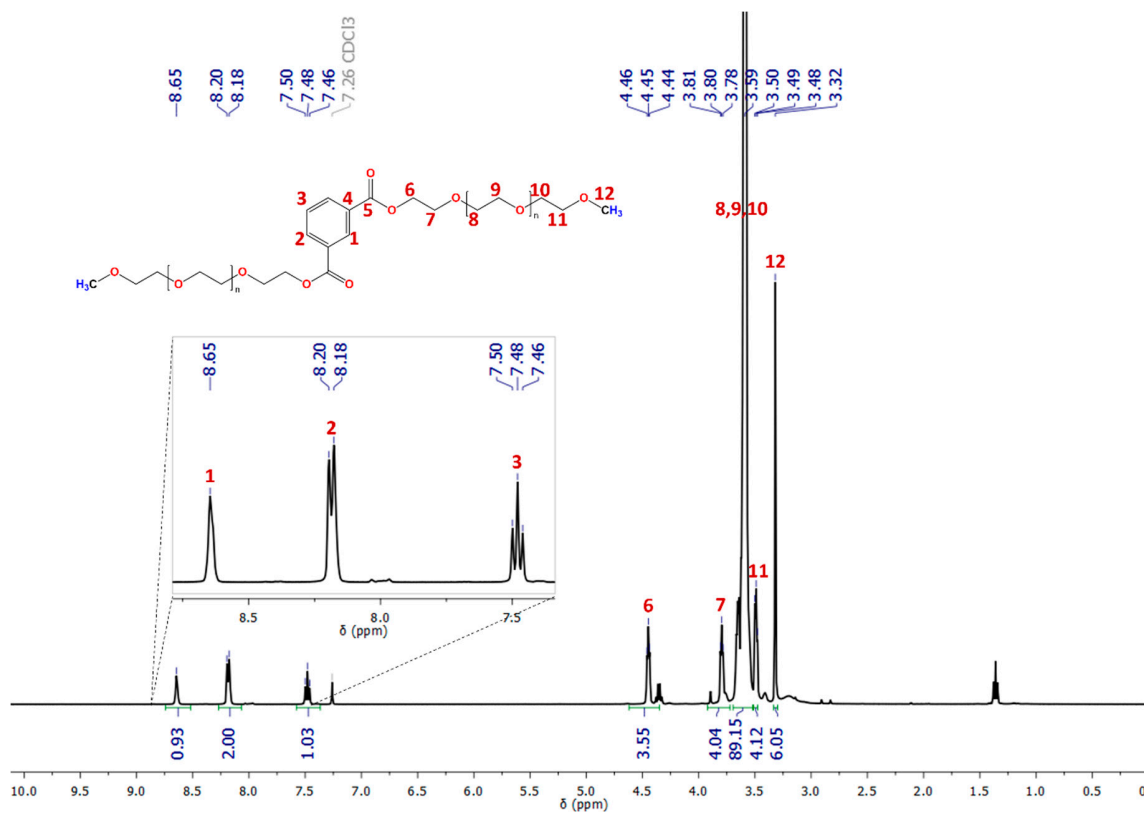

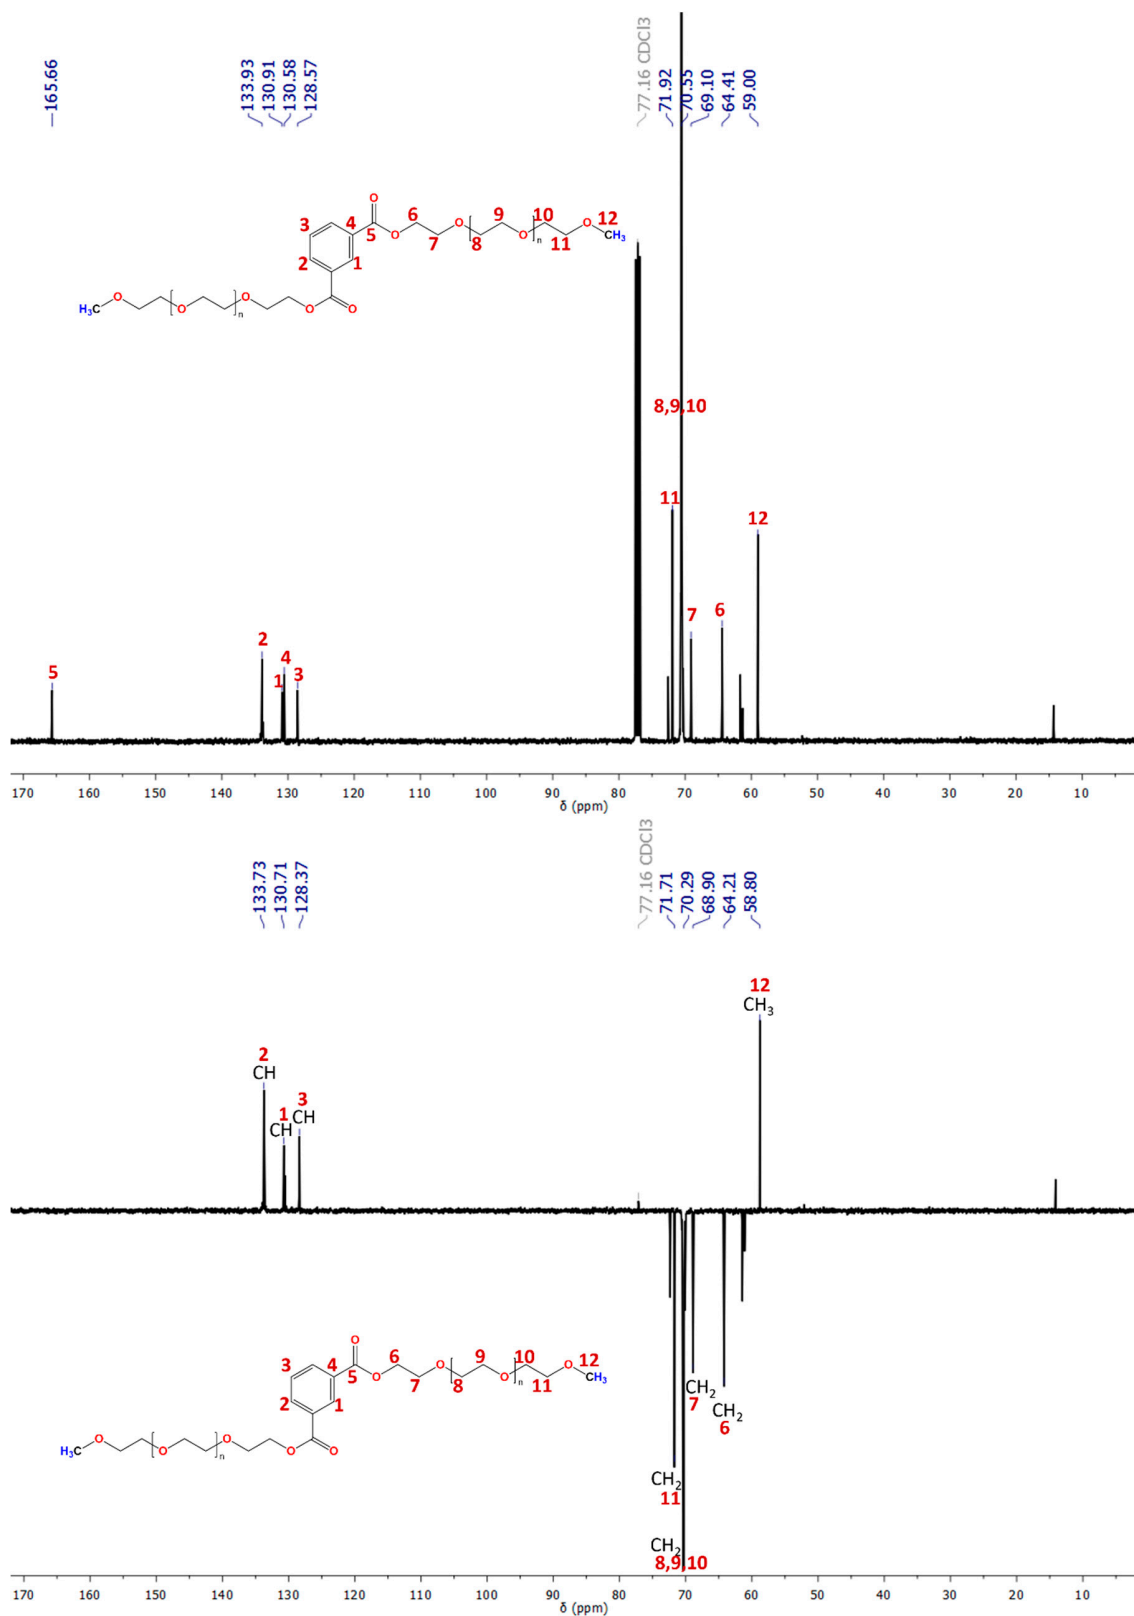

**Figure S8.** Infrared and <sup>1</sup>H, <sup>13</sup>C and DEPT 135° NMR spectra of IPC-MPEG550.

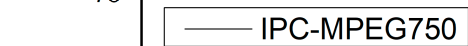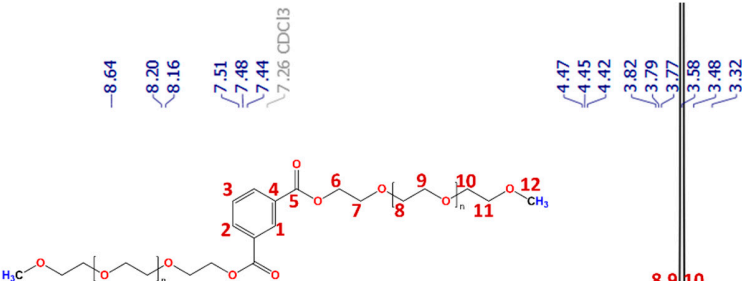

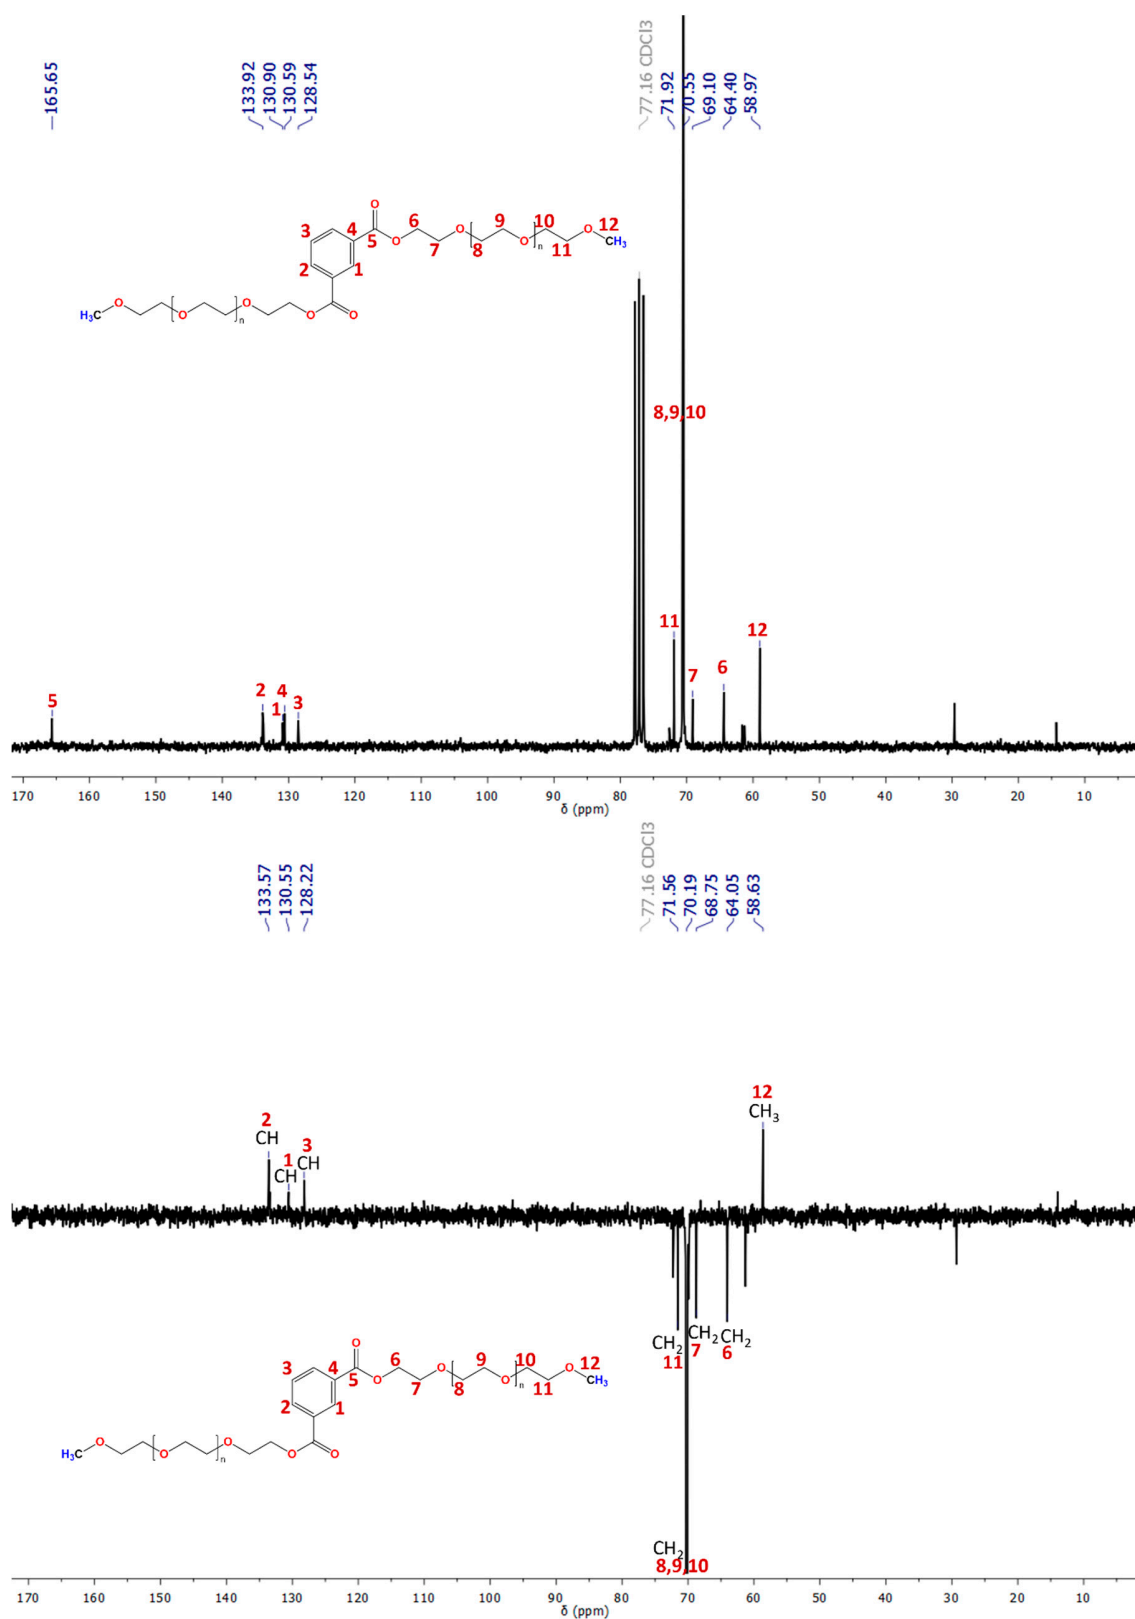

**Figure S9.** Infrared and <sup>1</sup>H, <sup>13</sup>C and DEPT 135° NMR spectra of IPC-MPEG750.

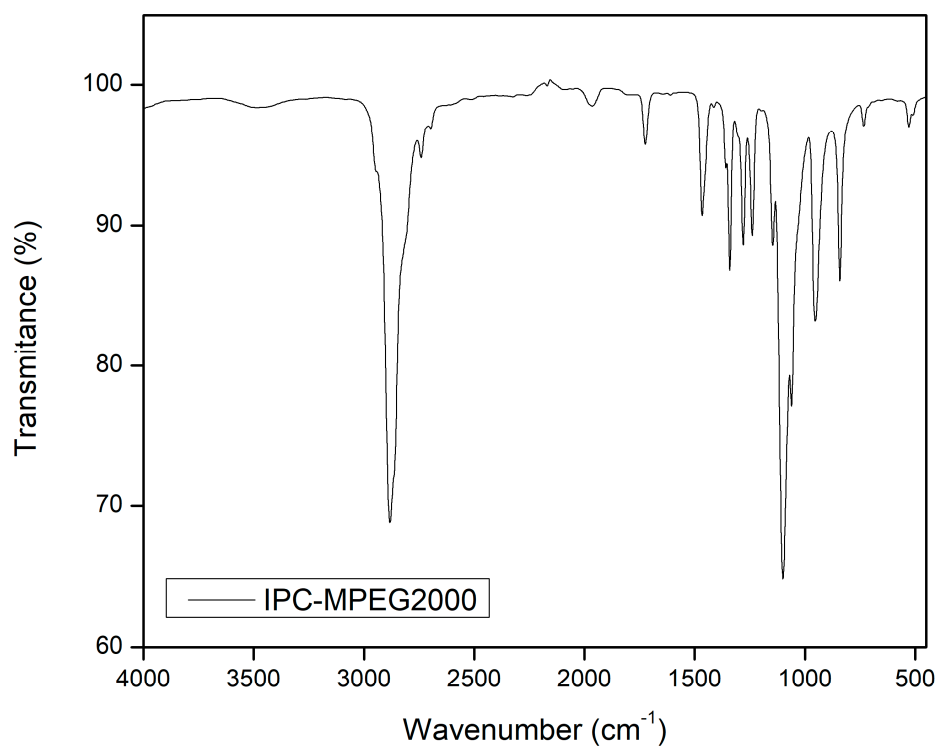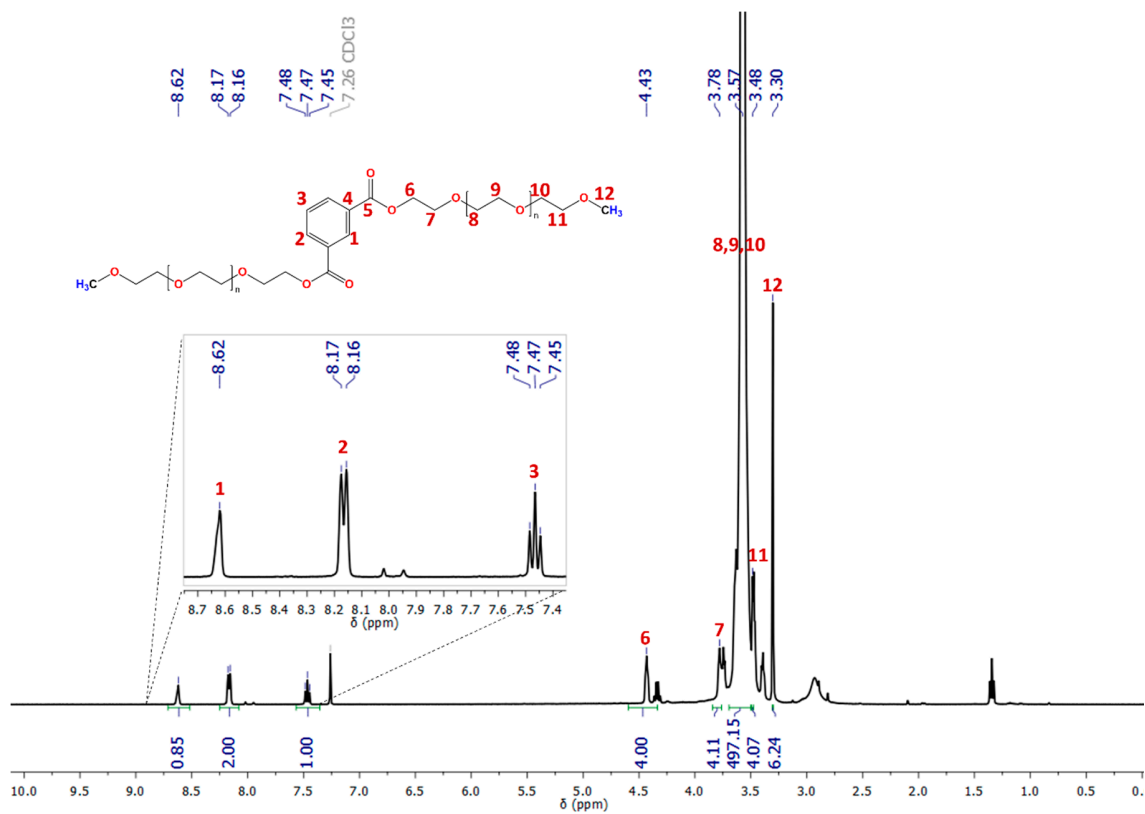

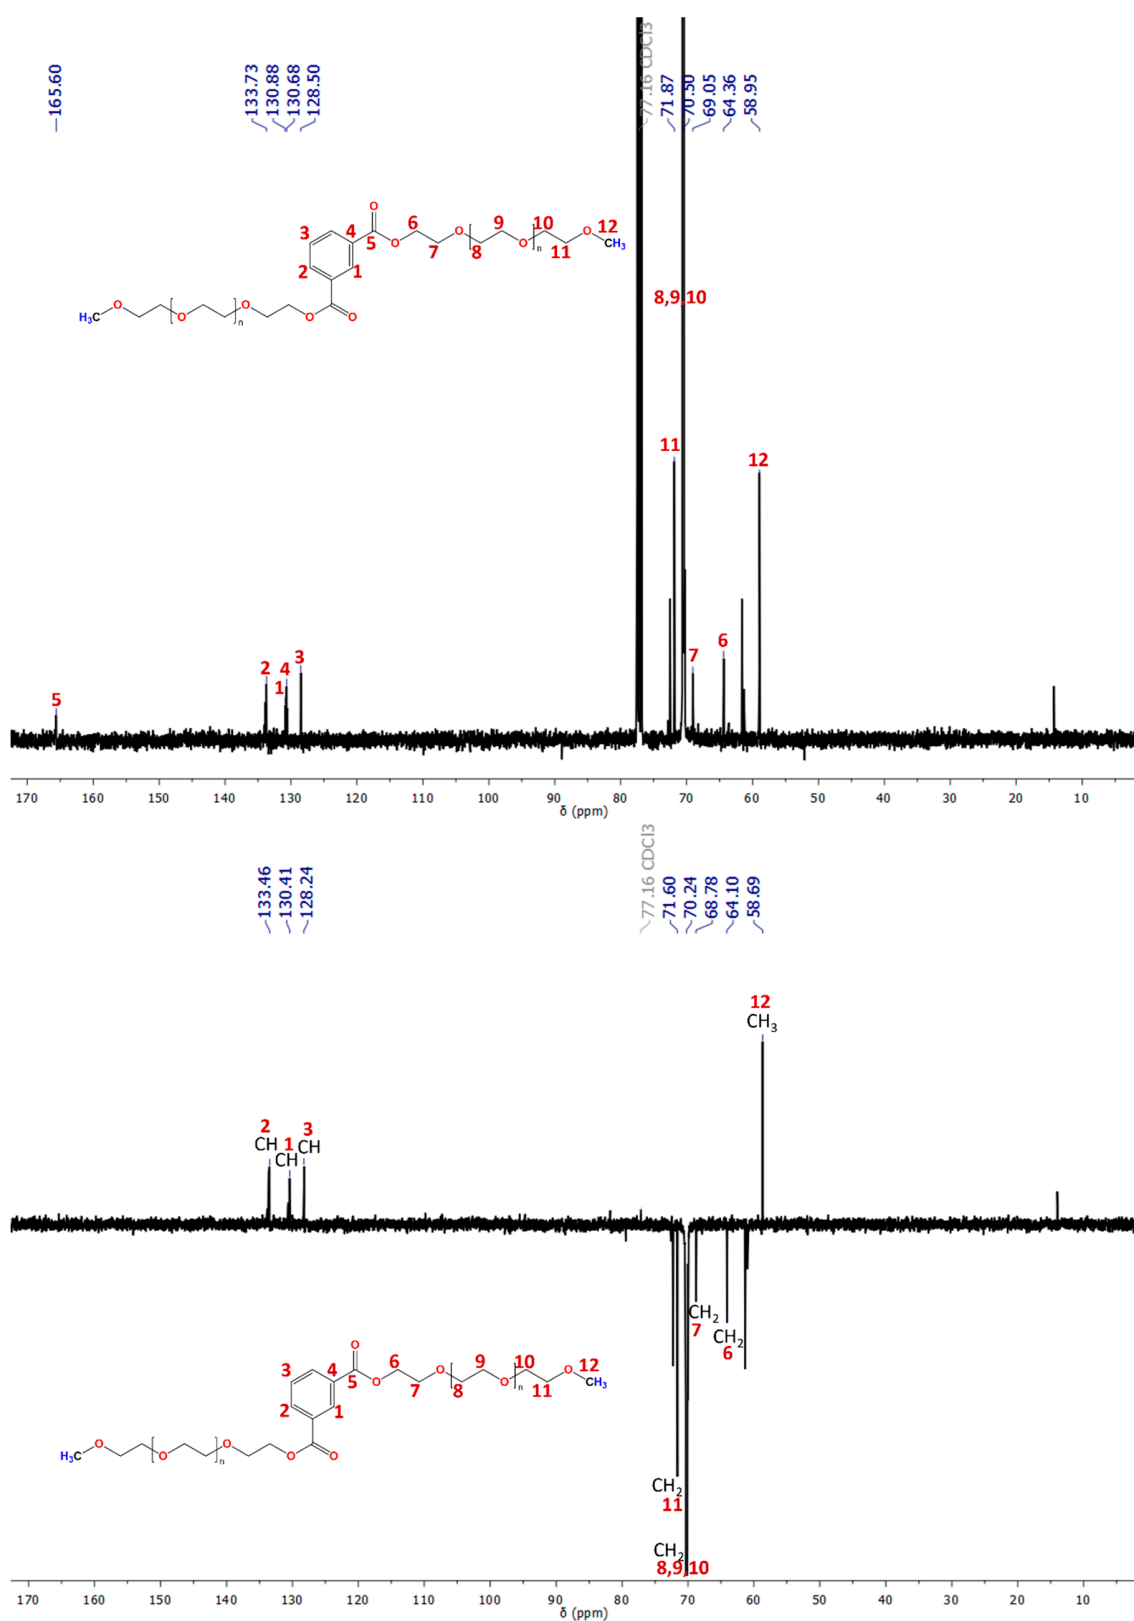

**Figure S10.** Infrared and  $^1\text{H}$ ,  $^{13}\text{C}$  and DEPT 135° NMR spectra of IPC-MPEG2000.

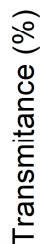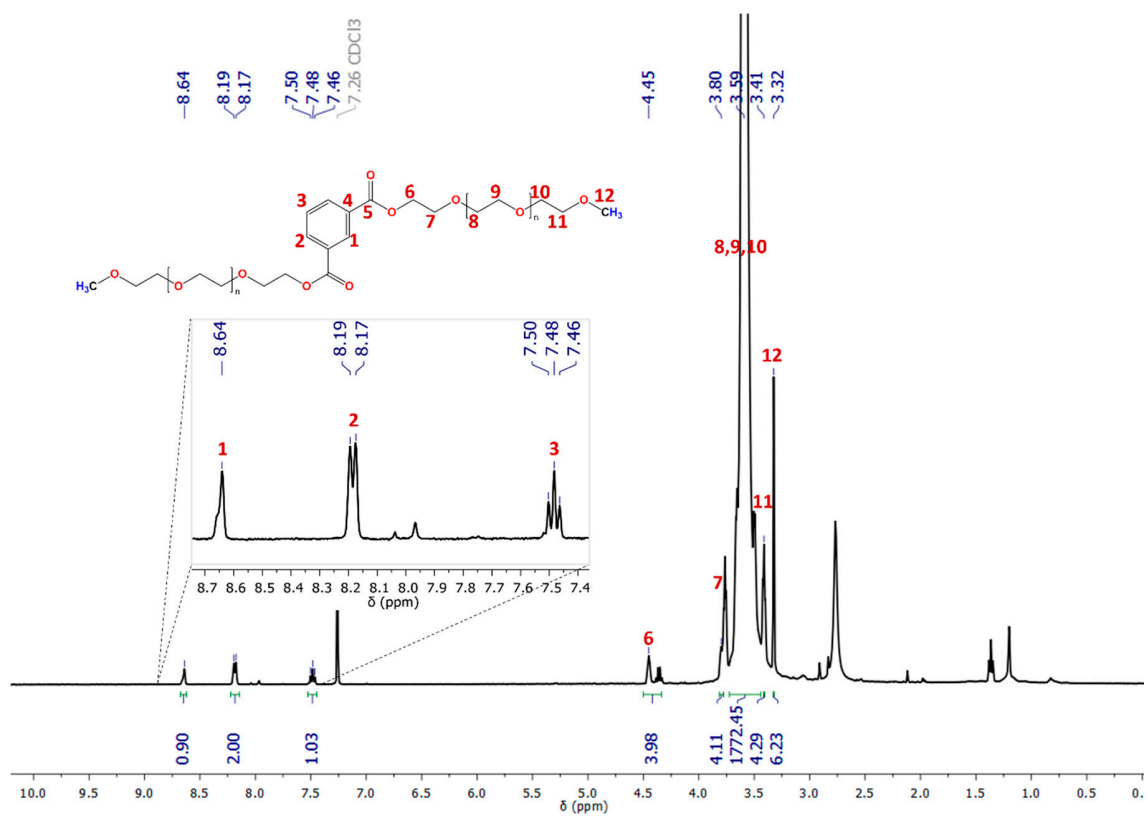

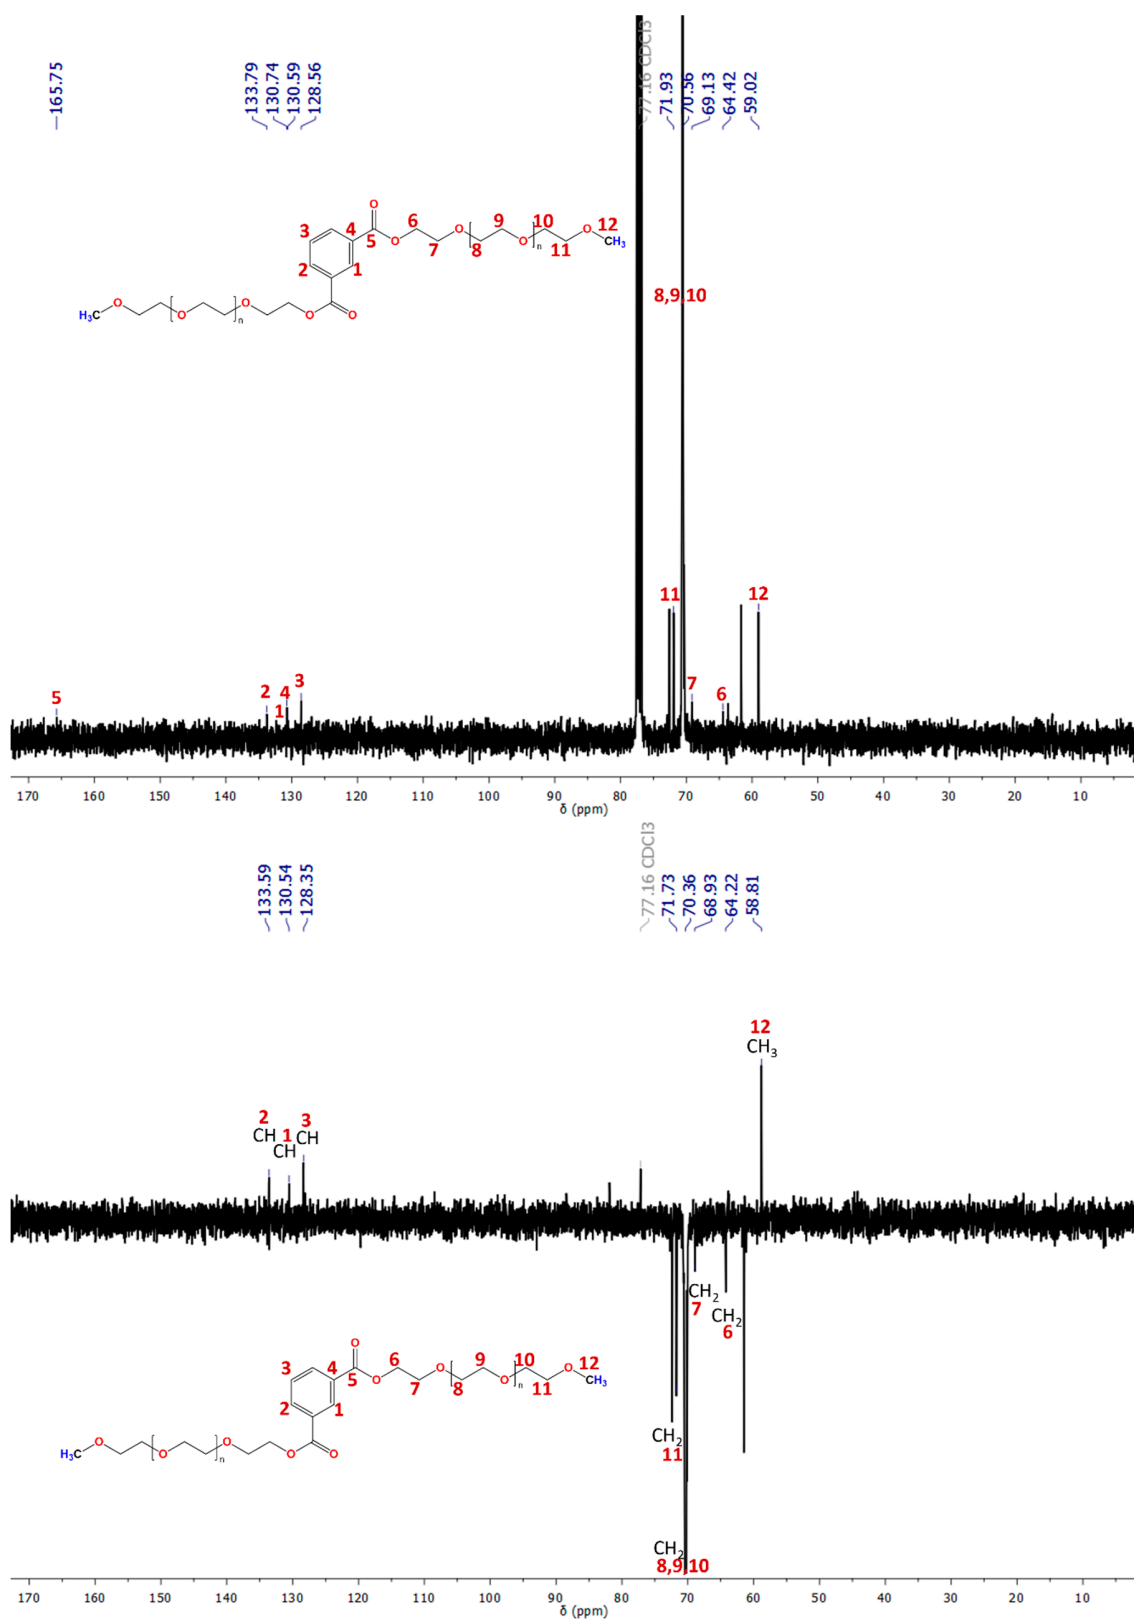

**Figure S11.** Infrared and  $^1\text{H}$ ,  $^{13}\text{C}$  and DEPT  $135^\circ$  NMR spectra of IPC-MPEG5000.



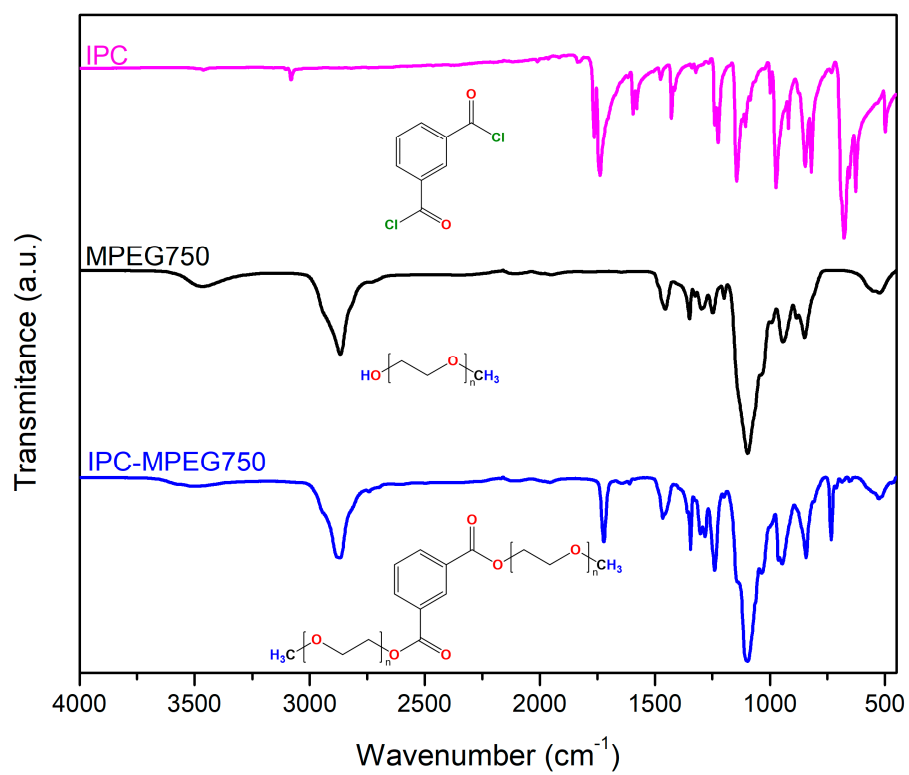

**Figure S12.** Comparison of IPC, MPEG 750 and IPC-MPEG750 infrared spectra.

**Table S2.** Theoretical hydrogen counts ( $I_t$ ) calculated in the repeating unit, and hydrogen counts obtained by  $^1\text{H}$  NMR in the IPC-MPEG series.

| Signal number | $\delta$ (ppm) and integral ( $I$ ) | PCMs        |             |             |              |              |
|---------------|-------------------------------------|-------------|-------------|-------------|--------------|--------------|
|               |                                     | IPC-MPEG350 | IPC-MPEG550 | IPC-MPEG750 | IPC-MPEG2000 | IPC-MPEG5000 |
| 1             | $\delta$                            | 8.61        | 8.65        | 8.64        | 8.62         | 8.64         |
|               | $I$                                 | 1           | 1           | 1           | 1            | 1            |
| 2             | $\delta$                            | 8.15        | 8.19        | 8.18        | 8.17         | 8.18         |
|               | $I$                                 | 2           | 2           | 2           | 2            | 2            |
| 3             | $\delta$                            | 7.44        | 7.78        | 7.48        | 7.47         | 7.48         |
|               | $I$                                 | 1           | 1           | 1           | 1            | 1            |
| 6             | $\delta$                            | 4.41        | 4.45        | 4.45        | 4.43         | 4.45         |
|               | $I$                                 | 4           | 4           | 4           | 4            | 4            |
| 7             | $\delta$                            | 3.76        | 3.80        | 3.79        | 3.78         | 3.80         |
|               | $I$                                 | 4           | 4           | 4           | 4            | 4            |
| 8,9,10        | $\delta$                            | 3.55        | 3.59        | 3.58        | 3.57         | 3.59         |
|               | $I$                                 | 50          | 89          | 125         | 497          | 1773         |
| 11            | $\delta$                            | 3.45        | 3.49        | 3.48        | 3.48         | 3.41         |
|               | $I$                                 | 4           | 4           | 4           | 4            | 4            |
| 12            | $\delta$                            | 3.28        | 3.32        | 3.32        | 3.30         | 3.32         |
|               | $I$                                 | 6           | 6           | 6           | 6            | 6            |
| Integral      | $\sum_6^{11} I_n$                   | 62          | 101         | 137         | 509          | 1785         |
|               | $I_t$                               | 58          | 94          | 130         | 357          | 902          |

$\delta$ : Chemical shift in  $^1\text{H}$  NMR spectrum,  $I$ : Integral obtained by  $^1\text{H}$  NMR,  $I_t$ : Integral obtained by Eq. (1) and  $\sum_6^{11} I_n$ : Summation of the integrals of signals 6 to 11 obtained by  $^1\text{H}$  NMR.
